# Supplementary material
Source: Research Square preprint supplement (doi:10.21203/rs.3.rs-10223696/v1)
Supplement: Supplementary file 1 [file 82c9cd48a79c81c39e48acc4.docx]

**Supplementary Materials**

**Global Policy Analysis: Aligning PM2.5 Reductions with Sustained Air Quality and Health Benefits**

**Content**

Supplementary Note 1: Data Source and Study Population

Supplementary Table 1: Countries included in the analysis by World Bank income group

Supplementary Note 2: Detection of structural breaks in PM2.5 exposure trends

Supplementary Table 2: Detected PM2.5 structural break years (1998–2023) by income group

Supplementary Note 3: Post-break trend evaluation and breakpoint prioritisation

Supplementary Table 3: Post-break annual trends in PM2.5 exposure following the first decreasing breakpoint.

Supplementary Note 4: Assessment of Disease Burden Attributable to PM2.5 Exposure using Integrated Exposure Response (IER) Model.

Supplementary Table 4.1: Annual PM2.5 Exposure (µg/m3), Relative Risk and PAF (%) attributable to COPD (* indicate breakpoint year)

Supplementary Table 4.2: Annual PM2.5 Exposure (µg/m3), Relative Risk and PAF (%) attributable to ST (* indicate breakpoint year)

Supplementary Table 4.3: Annual PM2.5 Exposure (µg/m3), Relative Risk and PAF (%) attributable to IHD (* indicate breakpoint year)

Supplementary Table 4.4: Annual PM2.5 Exposure (µg/m3), Relative Risk and PAF (%) attributable to LRI (* indicate breakpoint year)

Supplementary Note 5: Short-term changes in PM2.5 exposure and disease-specific population attributable fractions following detected structural breakpoints

Supplementary Table 5: Percentage change in disease-specific population attributable fractions (PAFs) within three years before and after PM2.5 breakpoints

Supplementary Note 6: Long-term evaluation of post-breakpoint exposure and health burden trends

Supplementary Table 6: Post-breakpoint trends in PM2.5 attributable disease burden

**Supplementary Note 1: Data Source and Study Population**

We analysed population-weighted annual mean PM2.5 concentration (µg/m3) for 1998–2023 using Global Burden of Disease (GBD) estimates. To account for time-varying economic and demographic factors that may confound PM2.5 trends, country-level gross domestic product (GDP) and urban population were obtained from the World Bank Open Data portal. The analytic sample included 159 countries with complete PM2.5, GDP, and urban population data across all 26 years. Countries were classified into high income, upper middle income, lower middle income and low-income groups according to World Bank income categories used consistently throughout analysis.

**Supplementary Table 1: Countries included in the analysis by World Bank income group**

| **S. No** | **High Income Countries** | **Upper Middle-Income Countries** | **Lower Middle-Income Countries** | **Low Income Countries** |
| --- | --- | --- | --- | --- |
| 1 | Andorra | Albania | Angola | Burkina Faso |
| 2 | Antigua and Barbuda | Algeria | Bangladesh | Burundi |
| 3 | Aruba | Argentina | Benin | Central African Republic |
| 4 | Australia | Armenia | Bolivia | Chad |
| 5 | Austria | Azerbaijan | Cambodia | Ethiopia |
| 6 | Bahrain | Belarus | Cameroon | Guinea-Bissau |
| 7 | Barbados | Belize | Comoros | Liberia |
| 8 | Belgium | Bosnia and Herzegovina | Ghana | Madagascar |
| 9 | Bermuda | Botswana | Guinea | Mozambique |
| 10 | Bulgaria | Brazil | Haiti | Malawi |
| 11 | Canada | China | Honduras | Mali |
| 12 | Chile | Colombia | India | Niger |
| 13 | Croatia | Costa Rica | Jordan | Rwanda |
| 14 | Cyprus | Cuba | Kenya | Sierra Leone |
| 15 | Denmark | Dominica | Kiribati | Somalia |
| 16 | Estonia | Dominican Republic | Lesotho | Sudan |
| 17 | Finland | Ecuador | Mauritania | Togo |
| 18 | France | El Salvador | Morocco | Uganda |
| 19 | Germany | Equatorial Guinea | Myanmar |  |
| 20 | Greece | Fiji | Nepal |  |
| 21 | Guyana | Gabon | Nicaragua |  |
| 22 | Hungary | Georgia | Nigeria |  |
| 23 | Iceland | Grenada | Pakistan |  |
| 24 | Ireland | Guatemala | Papua New Guinea |  |
| 25 | Israel | Indonesia | Philippines |  |
| 26 | Italy | Iraq | Samoa |  |
| 27 | Japan | Jamaica | Senegal |  |
| 28 | Kuwait | Kazakhstan | Solomon Islands |  |
| 29 | Latvia | Libya | Sri Lanka |  |
| 30 | Lithuania | Malaysia | Tajikistan |  |
| 31 | Luxembourg | Maldives | Tanzania |  |
| 32 | Malta | Marshall Islands | Timor-Leste |  |
| 33 | Monaco | Mauritius | Tunisia |  |
| 34 | Nauru | Mexico | Uzbekistan |  |
| 35 | Netherlands | Moldova | Vanuatu |  |
| 36 | New Zealand | Mongolia | Zambia |  |
| 37 | Norway | Montenegro | Zimbabwe |  |
| 38 | Oman | Namibia |  |  |
| 39 | Palau | Paraguay |  |  |
| 40 | Panama | Peru |  |  |
| 41 | Poland | Serbia |  |  |
| 42 | Portugal | South Africa |  |  |
| 43 | Puerto Rico | Suriname |  |  |
| 44 | Qatar | Thailand |  |  |
| 45 | Romania | Turkmenistan |  |  |
| 46 | Saudi Arabia | Tuvalu |  |  |
| 47 | Seychelles | Ukraine |  |  |
| 48 | Singapore |  |  |  |
| 49 | Slovenia |  |  |  |
| 50 | Spain |  |  |  |
| 51 | Sweden |  |  |  |
| 52 | Switzerland |  |  |  |
| 53 | Trinidad and Tobago |  |  |  |
| 54 | United Arab Emirates |  |  |  |
| 55 | United Kingdom |  |  |  |
| 56 | United States |  |  |  |
| 57 | Uruguay |  |  |  |

**Supplementary Note 2: Detection of structural breaks in PM2.5 exposure trends**

To identify countries exhibiting statistically significant structural shifts (breakpoints) in PM2.5 exposure trends, we applied impulse indicator saturation (IIS) within the isatpanel framework in R. This data-driven approach detects unknown breakpoints without requiring pre-specified change points. For each country, we fitted a log-linear model:

Log (PM2.5 i,t) = β0 + β1 log (GDP i,t) + β2 log (Urban Pop i,t) + ε i,t Where,

PM2.5 i,t = Annual average PM2.5 exposure for country i in year t

GDP i,t = Gross Domestic Product

Urban Pop i,t = Urban Population. Variables were log-transformed to reduce skewness

To prioritise trend (slope) changes rather than isolated one-year anomalies, we enabled factor-enhanced saturation with impulse saturation (FESIS), which improves discrimination of persistent structural shifts from transient outliers and reduces false positives. Breakpoints were retained using a stringent significance threshold (p < 0.01).

**Supplementary Table 2: Detected PM2.5 structural break years (1998–2023) by income group**

| **S. No** | **High Income Countries** | **Break Years** | **Upper Middle-Income Countries** | **Break Years** | **Lower Middle-Income Countries** | **Break Years** |
| --- | --- | --- | --- | --- | --- | --- |
| 1 | Andorra | 2013 | Albania | 2020 | Angola | 2014 |
| 2 | Antigua and Barbuda | 2013, 2015, 2018 | Algeria | 2011 | Bangladesh | 2013, 2022 |
| 3 | Australia | 2019, 2020 | Argentina | 2014 | Bolivia | 2011 |
| 4 | Austria | 2007 | Belarus | 2022 | Comoros | 2014 |
| 5 | Belgium | 2003, 2007, 2014, 2019 | Bosnia and Herzegovina | 2019 | Haiti | 2008, 2010, 2011, 2022 |
| 6 | Bermuda | 2013 | Botswana | 2014 | Honduras | 1999 |
| 7 | Bulgaria | 2013, 2020 | Brazil | 2012 | India | 2019, 2020 |
| 8 | Canada | 2009 | China | 2016, 2018, 2020 | Lesotho | 2012 |
| 9 | Chile | 2018 | Costa Rica | 1999 | Mauritania | 2001 |
| 10 | Croatia | 2013, 2019 | Ecuador | 2006 | Nicaragua | 1999 |
| 11 | Cyprus | 2013, 2016 | El Salvador | 1999 | Pakistan | 2019 |
| 12 | Estonia | 2011, 2015 | Fiji | 2012 | Senegal | 2001 |
| 13 | Finland | 2015 | Grenada | 2013, 2018 | Solomon Islands | 2019 |
| 14 | France | 2014, 2020 | Guatemala | 1999 | Sri Lanka | 2019 |
| 15 | Germany | 2019 | Iraq | 2013 | Tajikistan | 2003, 2009 |
| 16 | Greece | 2013 | Malaysia | 2016 | Vanuatu | 2020 |
| 17 | Hungary | 2019 | Maldives | 2012, 2019 |
| 18 | Italy | 2016, 2021 | Marshall Islands | 2012, 2015, 2016 |
| 19 | Japan | 2016 | Mauritius | 2020 |
| 20 | Latvia | 2002 | Mexico | 1999, 2002-2009 |
| 21 | Lithuania | 2002, 2016 | Mongolia | 2022 |
| 22 | Luxembourg | 1999, 2014, 2019 | Montenegro | 2019 |
| 23 | Malta | 2012 | Namibia | 2012, 2014 |
| 24 | Monaco | 2013, 2019 | South Africa | 2011 |
| 25 | Nauru | 2016, 2019, 2020 | Thailand | 2015 |
| 26 | Netherlands | 2012, 2015, 2020 | Ukraine | 2014, 2019 |
| 27 | New Zealand | 2020 |
| 28 | Norway | 2015, 2020 |
| 29 | Palau | 2016 |
| 30 | Poland | 2019 |
| 31 | Portugal | 2005, 2006, 2008 |
| 32 | Romania | 2019 |
| 33 | Seychelles | 2012, 2020 |
| 34 | Spain | 2016 |
| 35 | Switzerland | 2003, 2004, 2014, 2019 |
| 36 | United Kingdom | 2020 |
| 37 | United States | 2015 |

**Supplementary Note 3: Post-break trend evaluation and breakpoint prioritisation**

Among countries with multiple statistically detected structural shifts in PM2.5 exposure trends, we prioritised breakpoint years followed by a consistent decline in PM2.5 exposure for at least two consecutive years. This criterion was applied to prioritise sustained post-break improvements in air quality rather than short-lived fluctuations or isolated year-to-year variability.

For countries with one or more detected decreasing breakpoints the earliest breakpoint associated with a sustained post-break decline was selected for trend evaluation. The earliest breakpoint was selected to understand the initial dynamic which helped in reducing exposure.

For each selected breakpoint, we estimated the post-break annual trend (slope) in PM2.5 exposure using ordinary least squares regression applied to the post-break segment of the time series. The slope represents the annual rate of change in PM2.5 exposure following the breakpoint, with negative values indicating declining exposure and positive values indicating increasing exposure. Statistical significance was assessed using a two-sided test on the slope coefficient, with p < 0.05 indicating a significant post-break trend.

A total of seventy-two country breakpoint events were evaluated. Among these, twenty-seven countries exhibiting a statistically significant change in post-break slope were retained for subsequent health burden evaluation using the integrated exposure–response framework. Breakpoints detected near the end of the study period with insufficient post-break observations resulted in undefined p-values.

**Supplementary Table 3: Post-break annual trends in PM2.5 exposure following the first decreasing breakpoint**. **Positive slopes (red bars) indicate increasing PM2.5 exposure, while negative slopes (green bar) reflect exposure reduction.**

| **S. No** | **High Income Country** | **Breakpoint Year** | **Slope Post Break Year** | **p- value (<0.05 is significant)** |
| --- | --- | --- | --- | --- |
| 1 | Andorra | 2013 | 0.007272727 | 0.90538 |
| 2 | Antigua and Barbuda | 2013 | -0.012727273 | 0.91308 |
| 3 | Australia | 2020 | -0.37 | 0.38799 |
| 4 | Austria | 2007 | -0.395098039 | 0.35678 |
| 5 | Belgium | 2014 | -0.506060606 | 0.00014 |
| 6 | Bulgaria | 2013 | -0.714545455 | 8.8E-05 |
| 7 | Bermuda | 2013 | -0.010909091 | 0.82476 |
| 8 | Canada | 2009 | 0.0375 | 0.47448 |
| 9 | Switzerland | 2003 | -0.354805195 | 4.3E-08 |
| 10 | Chile | 2018 | 1.794285714 | 0.01734 |
| 11 | Cyprus | 2013 | -0.194545455 | 0.0546 |
| 12 | Germany | 2019 | -0.34 | 0.12747 |
| 13 | Spain | 2016 | -0.066666667 | 0.35054 |
| 14 | Estonia | 2011 | -0.270879121 | 0.00044 |
| 15 | Finland | 2015 | -0.105 | 0.06995 |
| 16 | France | 2014 | -0.344242424 | 0.00081 |
| 17 | United Kingdom | 2020 | 0.05 | 0.70889 |
| 18 | Greece | 2013 | -0.048181818 | 0.36577 |
| 19 | Croatia | 2013 | -0.578181818 | 0.00058 |
| 20 | Hungary | 2019 | -0.52 | 0.09143 |
| 21 | Italy | 2016 | -0.321428571 | 0.01676 |
| 22 | Japan | 2016 | -0.063095238 | 0.34177 |
| 23 | Lithuania | 2002 | -0.300790514 | 0.00031 |
| 24 | Latvia | 2002 | -0.358610954 | 8E-06 |
| 25 | Monaco | 2013 | -0.341818182 | 0.00239 |
| 26 | Malta | 2012 | -0.068531469 | 0.29688 |
| 27 | Netherlands | 2012 | -0.486363636 | 3E-06 |
| 28 | Norway | 2015 | -0.063333333 | 0.29155 |
| 29 | Nauru | 2016 | 0.023809524 | 0.88714 |
| 30 | New Zealand | 2020 | -0.02 | 0.86516 |
| 31 | Palau | 2016 | 0.017857143 | 0.83091 |
| 32 | Poland | 2019 | -0.84 | 0.17068 |
| 33 | Portugal | 2005 | -0.224385965 | 0.00255 |
| 34 | Romania | 2019 | -0.55 | 0.01221 |
| 35 | Seychelles | 2012 | -0.061538462 | 0.32337 |
| 36 | United States | 2015 | 0.041666667 | 0.49159 |
|  | **Upper Middle Income** | | | |
| 1 | Albania | 2020 | -0.005971018 | 0.71682 |
| 2 | Argentina | 2014 | 0.013027808 | 0.02095 |
| 3 | Bosnia and Herzegovina | 2019 | -0.032115814 | 0.03978 |
| 4 | Belarus | 2022 | -0.00851069 | NA |
| 5 | Brazil | 2012 | 0.006016944 | 0.01845 |
| 6 | Botswana | 2014 | 0.013644878 | 0.23793 |
| 7 | China | 2016 | -0.055935184 | 0.00036 |
| 8 | Algeria | 2011 | 0.006681103 | 0.08937 |
| 9 | Ecuador | 2006 | 0.007440309 | 7E-05 |
| 10 | Fiji | 2012 | 0.005479937 | 0.42174 |
| 11 | Grenada | 2013 | 0.006096971 | 0.51278 |
| 12 | Iraq | 2013 | 0.004172244 | 0.59098 |
| 13 | Maldives | 2012 | -0.014610439 | 0.1255 |
| 14 | Marshall Islands | 2012 | -0.015619032 | 0.01505 |
| 15 | Montenegro | 2019 | -0.027101944 | 0.1129 |
| 16 | Mongolia | 2022 | -0.099734966 | NA |
| 17 | Mauritius | 2020 | 0.005491576 | 0.71719 |
| 18 | Malaysia | 2016 | -0.001468986 | 0.94349 |
| 19 | Namibia | 2012 | 0.002482303 | 0.72531 |
| 20 | Thailand | 2015 | 0.004819992 | 0.37669 |
| 21 | Ukraine | 2014 | -0.037244565 | 7.6E-05 |
| 22 | South Africa | 2011 | 0.007712378 | 0.01435 |
|  | **Lower Middle Income** | | | |
| 1 | Angola | 2014 | 0.227272727 | 0.23468 |
| 2 | Bangladesh | 2013 | 0.268181818 | 0.58947 |
| 3 | Bolivia | 2011 | 0.382417582 | 0.0082 |
| 4 | Comoros | 2014 | 0.096969697 | 0.20376 |
| 5 | Haiti | 2008 | 0.013382353 | 0.79773 |
| 6 | India | 2019 | -1.02 | 0.16247 |
| 7 | Sri Lanka | 2019 | -0.24 | 0.59973 |
| 8 | Lesotho | 2012 | 0.444755245 | 0.00547 |
| 9 | Mauritania | 2001 | -0.179249012 | 0.10406 |
| 10 | Pakistan | 2019 | 0.76 | 0.17825 |
| 11 | Senegal | 2001 | 0.017391304 | 0.86786 |
| 12 | Solomon Islands | 2019 | 0.24 | 0.46447 |
| 13 | Tajikistan | 2003 | 0.441428571 | 3.7E-07 |
| 14 | Vanuatu | 2020 | 0.44 | 0.12 |

**Supplementary Note 4: Assessment of Disease Burden Attributable to PM2.5 Exposure using Integrated Exposure Response (IER) Model.**

To evaluate how structural shifts in PM2.5 exposure translated into health outcomes, we estimated disease-specific health burdens using the Integrated Exposure–Response (IER) model. The IER model characterizes the non- linear relationship between long-term PM2.5 exposure and relative risk (RR) for five major PM2.5- related diseases: Chronic Obstructive Pulmonary Disease (COPD), Stroke (ST), ischemic heart disease (IHD) and Lower Respiratory Infection (LRI). The IER model assumes a theoretical minimum risk exposure level (TMREL) of 2.4 µg/m³, below which additional health benefits are unlikely. Relative risk increases steeply at low exposure levels and plateaus at higher concentrations, reflecting the non-linear dose–response pattern of PM2.5 toxicity.

The IER function:

RR(z)= 1+ α (1−e−β γ) Where,

z is the PM2.5 concentration (in µg/m³)

zcf = 2.4 µg/m3, counterfactual concentration below which no additional health risk (based on GBD recommendations) and α, β, γ are disease-specific fitted parameters, which define the shape and steepness of the risk curve.

To quantify the proportion of disease burden attributable to PM2.5 exposure, we calculated the Population Attributable Fraction for each disease computed as:

PAF = .

PAF estimates facilitate assessment of whether structural improvement in air quality is accompanied by measurable and sustained health benefits.

**Supplementary Table 4.1: Annual PM2.5 Exposure (µg /m3), Relative Risk and PAF (%) attributable to Chronic Obstructive Pulmonary Disease (* indicates breakpoint year)**

| **High Income Countries** | **Year** | **PM2.5** | **RR Mean** | **RR Lower** | **RR Upper** | **PAF Mean** | **PAF Lower** | **PAF Upper** |
| --- | --- | --- | --- | --- | --- | --- | --- | --- |
| Belgium | 2011 | 17 | 1.11 | 1.10 | 1.12 | 10 | 9 | 10.9 |
| Belgium | 2012 | 15.3 | 1.09 | 1.08 | 1.10 | 8.3 | 7.5 | 8.9 |
| Belgium | 2013 | 15.9 | 1.10 | 1.09 | 1.11 | 8.9 | 8 | 9.6 |
| Belgium | 2014* | 13.2 | 1.07 | 1.06 | 1.07 | 6.3 | 5.8 | 6.7 |
| Belgium | 2015 | 12.7 | 1.06 | 1.06 | 1.07 | 5.8 | 5.4 | 6.2 |
| Belgium | 2016 | 12.3 | 1.06 | 1.05 | 1.06 | 5.5 | 5.1 | 5.8 |
| Belgium | 2017 | 11.9 | 1.05 | 1.05 | 1.06 | 5.1 | 4.8 | 5.4 |
| Bulgaria | 2010 | 25 | 1.23 | 1.19 | 1.26 | 18.6 | 16.3 | 20.7 |
| Bulgaria | 2011 | 30.3 | 1.32 | 1.27 | 1.38 | 24.4 | 21.1 | 27.3 |
| Bulgaria | 2012 | 25.9 | 1.24 | 1.21 | 1.28 | 19.6 | 17.1 | 21.8 |
| Bulgaria | 2013 | 23.7 | 1.21 | 1.18 | 1.24 | 17.2 | 15.1 | 19.1 |
| Bulgaria | 2014* | 24.5 | 1.22 | 1.19 | 1.25 | 18.1 | 15.8 | 20.1 |
| Bulgaria | 2015 | 21.6 | 1.18 | 1.15 | 1.20 | 14.9 | 13.1 | 16.4 |
| Bulgaria | 2016 | 21.2 | 1.17 | 1.15 | 1.19 | 14.5 | 12.8 | 16 |
| Switzerland | 2000 | 15.1 | 1.09 | 1.08 | 1.10 | 8.1 | 7.4 | 8.7 |
| Switzerland | 2001 | 15.2 | 1.09 | 1.08 | 1.10 | 8.2 | 7.5 | 8.8 |
| Switzerland | 2002 | 15.8 | 1.10 | 1.09 | 1.10 | 8.8 | 8 | 9.5 |
| Switzerland | 2003* | 17.1 | 1.11 | 1.10 | 1.12 | 10.1 | 9.1 | 11 |
| Switzerland | 2004 | 13.2 | 1.07 | 1.06 | 1.07 | 6.3 | 5.8 | 6.7 |
| Switzerland | 2005 | 14 | 1.08 | 1.07 | 1.08 | 7 | 6.5 | 7.5 |
| Switzerland | 2006 | 14.4 | 1.08 | 1.07 | 1.09 | 7.4 | 6.8 | 7.9 |
| Chile | 2015 | 25.1 | 1.23 | 1.20 | 1.26 | 18.7 | 16.4 | 20.8 |
| Chile | 2016 | 24.5 | 1.22 | 1.19 | 1.25 | 18.1 | 15.8 | 20.1 |
| Chile | 2017 | 23.6 | 1.21 | 1.18 | 1.23 | 17.1 | 15 | 19 |
| Chile | 2018* | 22.4 | 1.19 | 1.16 | 1.21 | 15.8 | 13.9 | 17.4 |
| Chile | 2019 | 22.2 | 1.18 | 1.16 | 1.21 | 15.6 | 13.7 | 17.2 |
| Chile | 2020 | 21.4 | 1.17 | 1.15 | 1.19 | 14.7 | 13 | 16.2 |
| Chile | 2021 | 24.9 | 1.23 | 1.19 | 1.26 | 18.5 | 16.2 | 20.6 |
| Estonia | 2008 | 9.7 | 1.03 | 1.03 | 1.04 | 3.4 | 3.2 | 3.4 |
| Estonia | 2009 | 9.7 | 1.03 | 1.03 | 1.04 | 3.4 | 3.2 | 3.4 |
| Estonia | 2010 | 10.6 | 1.04 | 1.04 | 1.04 | 4.1 | 3.8 | 4.2 |
| Estonia | 2011* | 8.8 | 1.03 | 1.03 | 1.03 | 2.7 | 2.6 | 2.7 |
| Estonia | 2012 | 8.9 | 1.03 | 1.03 | 1.03 | 2.8 | 2.7 | 2.8 |
| Estonia | 2013 | 8.6 | 1.03 | 1.03 | 1.03 | 2.6 | 2.5 | 2.6 |
| Estonia | 2014 | 9.8 | 1.04 | 1.03 | 1.04 | 3.4 | 3.3 | 3.5 |
| France | 2011 | 15.6 | 1.09 | 1.08 | 1.10 | 8.6 | 7.8 | 9.3 |
| France | 2012 | 14.1 | 1.08 | 1.07 | 1.08 | 7.1 | 6.5 | 7.6 |
| France | 2013 | 14.4 | 1.08 | 1.07 | 1.09 | 7.4 | 6.8 | 7.9 |
| France | 2014* | 11.5 | 1.05 | 1.05 | 1.05 | 4.8 | 4.5 | 5 |
| France | 2015 | 12.2 | 1.06 | 1.05 | 1.06 | 5.4 | 5 | 5.7 |
| France | 2016 | 11.2 | 1.05 | 1.04 | 1.05 | 4.5 | 4.3 | 4.7 |
| France | 2017 | 10.8 | 1.04 | 1.04 | 1.05 | 4.2 | 4 | 4.4 |
| Croatia | 2010 | 21.3 | 1.17 | 1.15 | 1.19 | 14.6 | 12.9 | 16.1 |
| Croatia | 2011 | 24.5 | 1.22 | 1.19 | 1.25 | 18.1 | 15.8 | 20.1 |
| Croatia | 2012 | 20.8 | 1.16 | 1.14 | 1.18 | 14 | 12.4 | 15.5 |
| Croatia | 2013* | 19.7 | 1.15 | 1.13 | 1.16 | 12.8 | 11.4 | 14.1 |
| Croatia | 2014 | 18.3 | 1.13 | 1.11 | 1.14 | 11.4 | 10.2 | 12.4 |
| Croatia | 2015 | 20.5 | 1.16 | 1.14 | 1.18 | 13.7 | 12.1 | 15.1 |
| Croatia | 2016 | 19.4 | 1.14 | 1.13 | 1.16 | 12.5 | 11.1 | 13.7 |
| Italy | 2013 | 17.5 | 1.12 | 1.10 | 1.13 | 10.5 | 9.4 | 11.4 |
| Italy | 2014 | 15.8 | 1.10 | 1.09 | 1.10 | 8.8 | 8 | 9.5 |
| Italy | 2015 | 18.5 | 1.13 | 1.12 | 1.14 | 11.6 | 10.3 | 12.6 |
| Italy | 2016* | 16.3 | 1.10 | 1.09 | 1.11 | 9.3 | 8.4 | 10.1 |
| Italy | 2017 | 17.4 | 1.12 | 1.10 | 1.13 | 10.4 | 9.4 | 11.3 |
| Italy | 2018 | 15.8 | 1.10 | 1.09 | 1.10 | 8.8 | 8 | 9.5 |
| Italy | 2019 | 15.1 | 1.09 | 1.08 | 1.10 | 8.1 | 7.4 | 8.7 |
| Lithuania | 1999 | 17.4 | 1.12 | 1.10 | 1.13 | 10.4 | 9.4 | 11.3 |
| Lithuania | 2000 | 15.1 | 1.09 | 1.08 | 1.10 | 8.1 | 7.4 | 8.7 |
| Lithuania | 2001 | 14.9 | 1.09 | 1.08 | 1.09 | 7.9 | 7.2 | 8.5 |
| Lithuania | 2002* | 17.7 | 1.12 | 1.11 | 1.13 | 10.7 | 9.6 | 11.7 |
| Lithuania | 2003 | 15.6 | 1.09 | 1.08 | 1.10 | 8.6 | 7.8 | 9.3 |
| Lithuania | 2004 | 13.5 | 1.07 | 1.06 | 1.08 | 6.6 | 6 | 7 |
| Lithuania | 2005 | 13.7 | 1.07 | 1.07 | 1.08 | 6.8 | 6.2 | 7.2 |
| Latvia | 1999 | 20 | 1.15 | 1.13 | 1.17 | 13.2 | 11.7 | 14.5 |
| Latvia | 2000 | 17.5 | 1.12 | 1.10 | 1.13 | 10.5 | 9.4 | 11.4 |
| Latvia | 2001 | 17.7 | 1.12 | 1.11 | 1.13 | 10.7 | 9.6 | 11.7 |
| Latvia | 2002* | 20.8 | 1.16 | 1.14 | 1.18 | 14 | 12.4 | 15.5 |
| Latvia | 2003 | 18.4 | 1.13 | 1.11 | 1.14 | 11.5 | 10.2 | 12.5 |
| Latvia | 2004 | 16.7 | 1.11 | 1.10 | 1.12 | 9.7 | 8.7 | 10.5 |
| Latvia | 2005 | 16.8 | 1.11 | 1.10 | 1.12 | 9.8 | 8.8 | 10.6 |
| Monaco | 2010 | 16.8 | 1.11 | 1.10 | 1.12 | 9.8 | 8.8 | 10.6 |
| Monaco | 2011 | 17.5 | 1.12 | 1.10 | 1.13 | 10.5 | 9.4 | 11.4 |
| Monaco | 2012 | 17.5 | 1.12 | 1.10 | 1.13 | 10.5 | 9.4 | 11.4 |
| Monaco | 2013* | 14.3 | 1.08 | 1.07 | 1.08 | 7.3 | 6.7 | 7.8 |
| Monaco | 2014 | 12.6 | 1.06 | 1.06 | 1.06 | 5.7 | 5.3 | 6.1 |
| Monaco | 2015 | 14.7 | 1.08 | 1.08 | 1.09 | 7.7 | 7 | 8.3 |
| Monaco | 2016 | 13.7 | 1.07 | 1.07 | 1.08 | 6.8 | 6.2 | 7.2 |
| Netherlands | 2009 | 16.4 | 1.10 | 1.09 | 1.11 | 9.4 | 8.5 | 10.2 |
| Netherlands | 2010 | 16.3 | 1.10 | 1.09 | 1.11 | 9.3 | 8.4 | 10.1 |
| Netherlands | 2011 | 16.4 | 1.10 | 1.09 | 1.11 | 9.4 | 8.5 | 10.2 |
| Netherlands | 2012* | 13.4 | 1.07 | 1.06 | 1.07 | 6.5 | 6 | 6.9 |
| Netherlands | 2013 | 13.8 | 1.07 | 1.07 | 1.08 | 6.8 | 6.3 | 7.3 |
| Netherlands | 2014 | 13.6 | 1.07 | 1.07 | 1.08 | 6.7 | 6.1 | 7.1 |
| Netherlands | 2015 | 12.2 | 1.06 | 1.05 | 1.06 | 5.4 | 5 | 5.7 |
| Portugal | 2002 | 12.7 | 1.06 | 1.06 | 1.07 | 5.8 | 5.4 | 6.2 |
| Portugal | 2003 | 14 | 1.08 | 1.07 | 1.08 | 7 | 6.5 | 7.5 |
| Portugal | 2004 | 11.6 | 1.05 | 1.05 | 1.05 | 4.9 | 4.6 | 5.1 |
| Portugal | 2005* | 16.3 | 1.10 | 1.09 | 1.11 | 9.3 | 8.4 | 10.1 |
| Portugal | 2006 | 12.7 | 1.06 | 1.06 | 1.07 | 5.8 | 5.4 | 6.2 |
| Portugal | 2007 | 12.4 | 1.06 | 1.05 | 1.06 | 5.6 | 5.2 | 5.9 |
| Portugal | 2008 | 8.9 | 1.03 | 1.03 | 1.03 | 2.8 | 2.7 | 2.8 |
| Romania | 2016 | 18.4 | 1.13 | 1.11 | 1.14 | 11.5 | 10.2 | 12.5 |
| Romania | 2017 | 20.3 | 1.16 | 1.14 | 1.17 | 13.5 | 12 | 14.8 |
| Romania | 2018 | 19.1 | 1.14 | 1.12 | 1.15 | 12.2 | 10.9 | 13.4 |
| Romania | 2019* | 17.1 | 1.11 | 1.10 | 1.12 | 10.1 | 9.1 | 11 |
| Romania | 2020 | 16.2 | 1.10 | 1.09 | 1.11 | 9.2 | 8.3 | 9.9 |
| Romania | 2021 | 15.6 | 1.09 | 1.08 | 1.10 | 8.6 | 7.8 | 9.3 |
| Romania | 2022 | 15.7 | 1.10 | 1.09 | 1.10 | 8.7 | 7.9 | 9.4 |
| United States | 2012 | 8.9 | 1.03 | 1.03 | 1.03 | 2.8 | 2.7 | 2.8 |
| United States | 2013 | 8.6 | 1.03 | 1.03 | 1.03 | 2.6 | 2.5 | 2.6 |
| United States | 2014 | 8.5 | 1.03 | 1.02 | 1.03 | 2.5 | 2.4 | 2.5 |
| United States | 2015* | 8.2 | 1.02 | 1.02 | 1.02 | 2.3 | 2.3 | 2.3 |
| United States | 2016 | 7.5 | 1.02 | 1.02 | 1.02 | 1.9 | 1.8 | 1.9 |
| United States | 2017 | 7.8 | 1.02 | 1.02 | 1.02 | 2 | 2 | 2 |
| United States | 2018 | 7.9 | 1.02 | 1.02 | 1.02 | 2.1 | 2.1 | 2.1 |
| United Kingdom | 2017 | 10.6 | 1.04 | 1.04 | 1.04 | 4.1 | 3.8 | 4.2 |
| United Kingdom | 2018 | 10.6 | 1.04 | 1.04 | 1.04 | 4.1 | 3.8 | 4.2 |
| United Kingdom | 2019 | 10.5 | 1.04 | 1.04 | 1.04 | 4 | 3.8 | 4.1 |
| United Kingdom | 2020* | 8.6 | 1.03 | 1.03 | 1.03 | 2.6 | 2.5 | 2.6 |
| United Kingdom | 2021 | 8.9 | 1.03 | 1.03 | 1.03 | 2.8 | 2.7 | 2.8 |
| United Kingdom | 2022 | 9.1 | 1.03 | 1.03 | 1.03 | 2.9 | 2.8 | 3 |
| United Kingdom | 2023 | 8.7 | 1.03 | 1.03 | 1.03 | 2.6 | 2.6 | 2.7 |
| **Upper Middle-Income Countries** | | | | | | | | |
| Argentina | 2011 | 14.9 | 1.09 | 1.08 | 1.09 | 7.9 | 7.2 | 8.5 |
| Argentina | 2012 | 14.1 | 1.08 | 1.07 | 1.08 | 7.1 | 6.5 | 7.6 |
| Argentina | 2013* | 14.2 | 1.08 | 1.07 | 1.08 | 7.2 | 6.6 | 7.7 |
| Argentina | 2014 | 13.1 | 1.07 | 1.06 | 1.07 | 6.2 | 5.7 | 6.6 |
| Argentina | 2015 | 13.5 | 1.07 | 1.06 | 1.08 | 6.6 | 6 | 7 |
| Argentina | 2016 | 13.5 | 1.07 | 1.06 | 1.08 | 6.6 | 6 | 7 |
| Argentina | 2017 | 12.9 | 1.06 | 1.06 | 1.07 | 6 | 5.6 | 6.4 |
| Bosnia and Herzegovina | 2016 | 34.2 | 1.40 | 1.32 | 1.47 | 28.4 | 24.5 | 31.9 |
| Bosnia and Herzegovina | 2017 | 32.8 | 1.37 | 1.30 | 1.43 | 27 | 23.3 | 30.3 |
| Bosnia and Herzegovina | 2018 | 32.6 | 1.37 | 1.30 | 1.43 | 26.8 | 23.1 | 30 |
| Bosnia and Herzegovina | 2019* | 28 | 1.28 | 1.23 | 1.32 | 21.9 | 19 | 24.5 |
| Bosnia and Herzegovina | 2020 | 28.9 | 1.30 | 1.25 | 1.34 | 22.9 | 19.8 | 25.6 |
| Bosnia and Herzegovina | 2021 | 26.6 | 1.26 | 1.22 | 1.29 | 20.4 | 17.7 | 22.7 |
| Bosnia and Herzegovina | 2022 | 26.4 | 1.25 | 1.21 | 1.29 | 20.2 | 17.6 | 22.5 |
| Brazil | 2009 | 14.2 | 1.08 | 1.07 | 1.08 | 7.2 | 6.6 | 7.7 |
| Brazil | 2010 | 14.3 | 1.08 | 1.07 | 1.08 | 7.3 | 6.7 | 7.8 |
| Brazil | 2011 | 14.1 | 1.08 | 1.07 | 1.08 | 7.1 | 6.5 | 7.6 |
| Brazil | 2012* | 13.4 | 1.07 | 1.06 | 1.07 | 6.5 | 6 | 6.9 |
| Brazil | 2013 | 12.9 | 1.06 | 1.06 | 1.07 | 6 | 5.6 | 6.4 |
| Brazil | 2014 | 13.3 | 1.07 | 1.06 | 1.07 | 6.4 | 5.9 | 6.8 |
| Brazil | 2015 | 13.8 | 1.07 | 1.07 | 1.08 | 6.8 | 6.3 | 7.3 |
| China | 2013 | 49.7 | 1.73 | 1.57 | 1.90 | 42.2 | 36.3 | 47.3 |
| China | 2014 | 52.4 | 1.79 | 1.61 | 1.98 | 44.2 | 38.1 | 49.4 |
| China | 2015 | 49.5 | 1.73 | 1.57 | 1.89 | 42 | 36.2 | 47.1 |
| China | 2016* | 45.1 | 1.63 | 1.49 | 1.76 | 38.5 | 33.1 | 43.2 |
| China | 2017 | 42.9 | 1.58 | 1.46 | 1.70 | 36.6 | 31.5 | 41.1 |
| China | 2018 | 38.2 | 1.48 | 1.39 | 1.57 | 32.3 | 27.8 | 36.3 |
| China | 2019 | 36.7 | 1.45 | 1.36 | 1.53 | 30.9 | 26.6 | 34.7 |
| Ecuador | 2003 | 16.4 | 1.10 | 1.09 | 1.11 | 9.4 | 8.5 | 10.2 |
| Ecuador | 2004 | 17.4 | 1.12 | 1.10 | 1.13 | 10.4 | 9.4 | 11.3 |
| Ecuador | 2005 | 18.9 | 1.14 | 1.12 | 1.15 | 12 | 10.7 | 13.1 |
| Ecuador | 2006* | 17.2 | 1.11 | 1.10 | 1.12 | 10.2 | 9.2 | 11.1 |
| Ecuador | 2007 | 17.4 | 1.12 | 1.10 | 1.13 | 10.4 | 9.4 | 11.3 |
| Ecuador | 2008 | 17.2 | 1.11 | 1.10 | 1.12 | 10.2 | 9.2 | 11.1 |
| Ecuador | 2009 | 17.1 | 1.11 | 1.10 | 1.12 | 10.1 | 9.1 | 11 |
| Marshall Islands | 2009 | 3.8 | 1.00 | 1.00 | 1.00 | 0.2 | 0.2 | 0.2 |
| Marshall Islands | 2010 | 4.2 | 1.00 | 1.00 | 1.00 | 0.3 | 0.4 | 0.3 |
| Marshall Islands | 2011 | 4.4 | 1.00 | 1.00 | 1.00 | 0.4 | 0.4 | 0.4 |
| Marshall Islands | 2012* | 3.6 | 1.00 | 1.00 | 1.00 | 0.2 | 0.2 | 0.1 |
| Marshall Islands | 2013 | 3.4 | 1.00 | 1.00 | 1.00 | 0.1 | 0.1 | 0.1 |
| Marshall Islands | 2014 | 3.3 | 1.00 | 1.00 | 1.00 | 0.1 | 0.1 | 0.1 |
| Marshall Islands | 2015 | 3.8 | 1.00 | 1.00 | 1.00 | 0.2 | 0.2 | 0.2 |
| Ukraine | 2011 | 19 | 1.14 | 1.12 | 1.15 | 12.1 | 10.8 | 13.2 |
| Ukraine | 2012 | 19 | 1.14 | 1.12 | 1.15 | 12.1 | 10.8 | 13.2 |
| Ukraine | 2013 | 18.3 | 1.13 | 1.11 | 1.14 | 11.4 | 10.2 | 12.4 |
| Ukraine | 2014* | 18.6 | 1.13 | 1.12 | 1.15 | 11.7 | 10.4 | 12.8 |
| Ukraine | 2015 | 16.7 | 1.11 | 1.10 | 1.12 | 9.7 | 8.7 | 10.5 |
| Ukraine | 2016 | 16.4 | 1.10 | 1.09 | 1.11 | 9.4 | 8.5 | 10.2 |
| Ukraine | 2017 | 16.9 | 1.11 | 1.10 | 1.12 | 9.9 | 8.9 | 10.7 |
| South Africa | 2008 | 25.8 | 1.24 | 1.20 | 1.28 | 19.5 | 17 | 21.7 |
| South Africa | 2009 | 24.9 | 1.23 | 1.19 | 1.26 | 18.5 | 16.2 | 20.6 |
| South Africa | 2010 | 28.7 | 1.29 | 1.24 | 1.34 | 22.6 | 19.6 | 25.3 |
| South Africa | 2011* | 25 | 1.23 | 1.19 | 1.26 | 18.6 | 16.3 | 20.7 |
| South Africa | 2012 | 26.1 | 1.25 | 1.21 | 1.28 | 19.8 | 17.3 | 22.1 |
| South Africa | 2013 | 25.1 | 1.23 | 1.20 | 1.26 | 18.7 | 16.4 | 20.8 |
| South Africa | 2014 | 23.2 | 1.20 | 1.17 | 1.23 | 16.6 | 14.6 | 18.5 |
| **Lower Middle-Income Countries** | | | | | | | | |
| Bolivia | 2008 | 27.8 | 1.28 | 1.23 | 1.32 | 21.7 | 18.8 | 24.2 |
| Bolivia | 2009 | 26.4 | 1.25 | 1.21 | 1.29 | 20.2 | 17.6 | 22.5 |
| Bolivia | 2010 | 36.8 | 1.45 | 1.36 | 1.53 | 31 | 26.7 | 34.8 |
| Bolivia | 2011* | 29.1 | 1.30 | 1.25 | 1.35 | 23.1 | 20 | 25.8 |
| Bolivia | 2012 | 26.9 | 1.26 | 1.22 | 1.30 | 20.7 | 18 | 23.1 |
| Bolivia | 2013 | 25.3 | 1.23 | 1.20 | 1.27 | 18.9 | 16.5 | 21.1 |
| Bolivia | 2014 | 26.5 | 1.25 | 1.21 | 1.29 | 20.3 | 17.6 | 22.6 |
| Lesotho | 2009 | 25.6 | 1.24 | 1.20 | 1.27 | 19.3 | 16.8 | 21.5 |
| Lesotho | 2010 | 28.7 | 1.29 | 1.24 | 1.34 | 22.6 | 19.6 | 25.3 |
| Lesotho | 2011 | 26 | 1.25 | 1.21 | 1.28 | 19.7 | 17.2 | 22 |
| Lesotho | 2012* | 23.6 | 1.21 | 1.18 | 1.23 | 17.1 | 15 | 19 |
| Lesotho | 2013 | 23 | 1.20 | 1.17 | 1.22 | 16.4 | 14.4 | 18.2 |
| Lesotho | 2014 | 22.1 | 1.18 | 1.16 | 1.21 | 15.4 | 13.6 | 17.1 |
| Lesotho | 2015 | 23.3 | 1.20 | 1.17 | 1.23 | 16.8 | 14.7 | 18.6 |
| Tajikistan | 2000 | 24.9 | 1.23 | 1.19 | 1.26 | 18.5 | 16.2 | 20.6 |
| Tajikistan | 2001 | 29.6 | 1.31 | 1.26 | 1.36 | 23.6 | 20.5 | 26.4 |
| Tajikistan | 2002 | 27.8 | 1.28 | 1.23 | 1.32 | 21.7 | 18.8 | 24.2 |
| Tajikistan | 2003* | 25.7 | 1.24 | 1.20 | 1.28 | 19.4 | 16.9 | 21.6 |
| Tajikistan | 2004 | 26.2 | 1.25 | 1.21 | 1.29 | 19.9 | 17.4 | 22.2 |
| Tajikistan | 2005 | 25.3 | 1.23 | 1.20 | 1.27 | 18.9 | 16.5 | 21.1 |
| Tajikistan | 2006 | 27.9 | 1.28 | 1.23 | 1.32 | 21.8 | 18.9 | 24.3 |

**Supplementary Table 4.2: Annual PM2.5 Exposure (µg /m3), Relative Risk and PAF (%) attributable to Stroke (* indicates breakpoint year)**

| **High Income Countries** | **Year** | **PM2.5** | **RR Mean** | **RR Lower** | **RR Upper** | **PAF Mean** | **PAF Lower** | **PAF Upper** |
| --- | --- | --- | --- | --- | --- | --- | --- | --- |
| Belgium | 2011 | 17 | 1.16 | 1.12 | 1.20 | 13.7 | 11 | 16.3 |
| Belgium | 2012 | 15.3 | 1.14 | 1.11 | 1.17 | 12.1 | 9.7 | 14.4 |
| Belgium | 2013 | 15.9 | 1.14 | 1.11 | 1.18 | 12.6 | 10.1 | 15.1 |
| Belgium | 2014* | 13.2 | 1.11 | 1.09 | 1.13 | 10 | 8 | 11.9 |
| Belgium | 2015 | 12.7 | 1.10 | 1.08 | 1.13 | 9.5 | 7.6 | 11.3 |
| Belgium | 2016 | 12.3 | 1.10 | 1.08 | 1.12 | 9.1 | 7.3 | 10.8 |
| Belgium | 2017 | 11.9 | 1.09 | 1.07 | 1.11 | 8.7 | 7 | 10.3 |
| Bulgaria | 2010 | 25 | 1.26 | 1.20 | 1.33 | 20.8 | 16.7 | 24.8 |
| Bulgaria | 2011 | 30.3 | 1.33 | 1.25 | 1.42 | 24.9 | 20 | 29.5 |
| Bulgaria | 2012 | 25.9 | 1.27 | 1.21 | 1.34 | 21.5 | 17.3 | 25.6 |
| Bulgaria | 2013 | 23.7 | 1.25 | 1.19 | 1.31 | 19.7 | 15.8 | 23.5 |
| Bulgaria | 2014* | 24.5 | 1.26 | 1.20 | 1.32 | 20.4 | 16.3 | 24.3 |
| Bulgaria | 2015 | 21.6 | 1.22 | 1.17 | 1.27 | 17.9 | 14.4 | 21.4 |
| Bulgaria | 2016 | 21.2 | 1.21 | 1.16 | 1.27 | 17.6 | 14.1 | 21 |
| Switzerland | 2000 | 15.1 | 1.13 | 1.11 | 1.16 | 11.9 | 9.5 | 14.1 |
| Switzerland | 2001 | 15.2 | 1.14 | 1.11 | 1.17 | 12 | 9.6 | 14.3 |
| Switzerland | 2002 | 15.8 | 1.14 | 1.11 | 1.18 | 12.5 | 10.1 | 15 |
| Switzerland | 2003* | 17.1 | 1.16 | 1.12 | 1.20 | 13.8 | 11.1 | 16.5 |
| Switzerland | 2004 | 13.2 | 1.11 | 1.09 | 1.13 | 10 | 8 | 11.9 |
| Switzerland | 2005 | 14 | 1.12 | 1.09 | 1.15 | 10.8 | 8.6 | 12.8 |
| Switzerland | 2006 | 14.4 | 1.13 | 1.10 | 1.15 | 11.2 | 9 | 13.3 |
| Chile | 2015 | 25.1 | 1.26 | 1.20 | 1.33 | 20.9 | 16.7 | 24.9 |
| Chile | 2016 | 24.5 | 1.26 | 1.20 | 1.32 | 20.4 | 16.3 | 24.3 |
| Chile | 2017 | 23.6 | 1.24 | 1.19 | 1.31 | 19.7 | 15.7 | 23.4 |
| Chile | 2018* | 22.4 | 1.23 | 1.18 | 1.29 | 18.6 | 14.9 | 22.2 |
| Chile | 2019 | 22.2 | 1.23 | 1.17 | 1.28 | 18.5 | 14.8 | 22 |
| Chile | 2020 | 21.4 | 1.22 | 1.17 | 1.27 | 17.8 | 14.2 | 21.2 |
| Chile | 2021 | 24.9 | 1.26 | 1.20 | 1.33 | 20.7 | 16.6 | 24.7 |
| Estonia | 2008 | 9.7 | 1.07 | 1.05 | 1.08 | 6.4 | 5.2 | 7.6 |
| Estonia | 2009 | 9.7 | 1.07 | 1.05 | 1.08 | 6.4 | 5.2 | 7.6 |
| Estonia | 2010 | 10.6 | 1.08 | 1.06 | 1.10 | 7.3 | 5.9 | 8.7 |
| Estonia | 2011* | 8.8 | 1.06 | 1.05 | 1.07 | 5.5 | 4.5 | 6.5 |
| Estonia | 2012 | 8.9 | 1.06 | 1.05 | 1.07 | 5.6 | 4.5 | 6.6 |
| Estonia | 2013 | 8.6 | 1.06 | 1.04 | 1.07 | 5.3 | 4.3 | 6.2 |
| Estonia | 2014 | 9.8 | 1.07 | 1.06 | 1.08 | 6.5 | 5.3 | 7.7 |
| France | 2011 | 15.6 | 1.14 | 1.11 | 1.17 | 12.4 | 9.9 | 14.7 |
| France | 2012 | 14.1 | 1.12 | 1.10 | 1.15 | 10.9 | 8.7 | 12.9 |
| France | 2013 | 14.4 | 1.13 | 1.10 | 1.15 | 11.2 | 9 | 13.3 |
| France | 2014* | 11.5 | 1.09 | 1.07 | 1.11 | 8.2 | 6.6 | 9.8 |
| France | 2015 | 12.2 | 1.10 | 1.08 | 1.12 | 9 | 7.2 | 10.6 |
| France | 2016 | 11.2 | 1.09 | 1.07 | 1.10 | 7.9 | 6.4 | 9.4 |
| France | 2017 | 10.8 | 1.08 | 1.06 | 1.10 | 7.5 | 6.1 | 8.9 |
| Croatia | 2010 | 21.3 | 1.21 | 1.16 | 1.27 | 17.7 | 14.1 | 21.1 |
| Croatia | 2011 | 24.5 | 1.26 | 1.20 | 1.32 | 20.4 | 16.3 | 24.3 |
| Croatia | 2012 | 20.8 | 1.21 | 1.16 | 1.26 | 17.2 | 13.8 | 20.5 |
| Croatia | 2013* | 19.7 | 1.19 | 1.15 | 1.24 | 16.2 | 13 | 19.4 |
| Croatia | 2014 | 18.3 | 1.18 | 1.14 | 1.22 | 14.9 | 12 | 17.8 |
| Croatia | 2015 | 20.5 | 1.20 | 1.16 | 1.25 | 17 | 13.6 | 20.2 |
| Croatia | 2016 | 19.4 | 1.19 | 1.15 | 1.24 | 16 | 12.8 | 19 |
| Italy | 2013 | 17.5 | 1.17 | 1.13 | 1.20 | 14.2 | 11.4 | 16.9 |
| Italy | 2014 | 15.8 | 1.14 | 1.11 | 1.18 | 12.5 | 10.1 | 15 |
| Italy | 2015 | 18.5 | 1.18 | 1.14 | 1.22 | 15.1 | 12.1 | 18 |
| Italy | 2016* | 16.3 | 1.15 | 1.12 | 1.18 | 13 | 10.4 | 15.5 |
| Italy | 2017 | 17.4 | 1.16 | 1.13 | 1.20 | 14.1 | 11.3 | 16.8 |
| Italy | 2018 | 15.8 | 1.14 | 1.11 | 1.18 | 12.5 | 10.1 | 15 |
| Italy | 2019 | 15.1 | 1.13 | 1.11 | 1.16 | 11.9 | 9.5 | 14.1 |
| Lithuania | 1999 | 17.4 | 1.16 | 1.13 | 1.20 | 14.1 | 11.3 | 16.8 |
| Lithuania | 2000 | 15.1 | 1.13 | 1.11 | 1.16 | 11.9 | 9.5 | 14.1 |
| Lithuania | 2001 | 14.9 | 1.13 | 1.10 | 1.16 | 11.7 | 9.4 | 13.9 |
| Lithuania | 2002* | 17.7 | 1.17 | 1.13 | 1.21 | 14.4 | 11.5 | 17.1 |
| Lithuania | 2003 | 15.6 | 1.14 | 1.11 | 1.17 | 12.4 | 9.9 | 14.7 |
| Lithuania | 2004 | 13.5 | 1.11 | 1.09 | 1.14 | 10.3 | 8.2 | 12.2 |
| Lithuania | 2005 | 13.7 | 1.12 | 1.09 | 1.14 | 10.5 | 8.4 | 12.5 |
| Latvia | 1999 | 20 | 1.20 | 1.15 | 1.25 | 16.5 | 13.2 | 19.7 |
| Latvia | 2000 | 17.5 | 1.17 | 1.13 | 1.20 | 14.2 | 11.4 | 16.9 |
| Latvia | 2001 | 17.7 | 1.17 | 1.13 | 1.21 | 14.4 | 11.5 | 17.1 |
| Latvia | 2002* | 20.8 | 1.21 | 1.16 | 1.26 | 17.2 | 13.8 | 20.5 |
| Latvia | 2003 | 18.4 | 1.18 | 1.14 | 1.22 | 15 | 12 | 17.9 |
| Latvia | 2004 | 16.7 | 1.16 | 1.12 | 1.19 | 13.4 | 10.8 | 16 |
| Latvia | 2005 | 16.8 | 1.16 | 1.12 | 1.19 | 13.5 | 10.8 | 16.1 |
| Monaco | 2010 | 16.8 | 1.16 | 1.12 | 1.19 | 13.5 | 10.8 | 16.1 |
| Monaco | 2011 | 17.5 | 1.17 | 1.13 | 1.20 | 14.2 | 11.4 | 16.9 |
| Monaco | 2012 | 17.5 | 1.17 | 1.13 | 1.20 | 14.2 | 11.4 | 16.9 |
| Monaco | 2013* | 14.3 | 1.12 | 1.10 | 1.15 | 11.1 | 8.9 | 13.2 |
| Monaco | 2014 | 12.6 | 1.10 | 1.08 | 1.13 | 9.4 | 7.5 | 11.1 |
| Monaco | 2015 | 14.7 | 1.13 | 1.10 | 1.16 | 11.5 | 9.2 | 13.7 |
| Monaco | 2016 | 13.7 | 1.12 | 1.09 | 1.14 | 10.5 | 8.4 | 12.5 |
| Netherlands | 2009 | 16.4 | 1.15 | 1.12 | 1.19 | 13.1 | 10.5 | 15.7 |
| Netherlands | 2010 | 16.3 | 1.15 | 1.12 | 1.18 | 13 | 10.4 | 15.5 |
| Netherlands | 2011 | 16.4 | 1.15 | 1.12 | 1.19 | 13.1 | 10.5 | 15.7 |
| Netherlands | 2012* | 13.4 | 1.11 | 1.09 | 1.14 | 10.2 | 8.2 | 12.1 |
| Netherlands | 2013 | 13.8 | 1.12 | 1.09 | 1.14 | 10.6 | 8.5 | 12.6 |
| Netherlands | 2014 | 13.6 | 1.12 | 1.09 | 1.14 | 10.4 | 8.3 | 12.3 |
| Netherlands | 2015 | 12.2 | 1.10 | 1.08 | 1.12 | 9 | 7.2 | 10.6 |
| Portugal | 2002 | 12.7 | 1.10 | 1.08 | 1.13 | 9.5 | 7.6 | 11.3 |
| Portugal | 2003 | 14 | 1.12 | 1.09 | 1.15 | 10.8 | 8.6 | 12.8 |
| Portugal | 2004 | 11.6 | 1.09 | 1.07 | 1.11 | 8.3 | 6.7 | 9.9 |
| Portugal | 2005* | 16.3 | 1.15 | 1.12 | 1.18 | 13 | 10.4 | 15.5 |
| Portugal | 2006 | 12.7 | 1.10 | 1.08 | 1.13 | 9.5 | 7.6 | 11.3 |
| Portugal | 2007 | 12.4 | 1.10 | 1.08 | 1.12 | 9.2 | 7.4 | 10.9 |
| Portugal | 2008 | 8.9 | 1.06 | 1.05 | 1.07 | 5.6 | 4.5 | 6.6 |
| Romania | 2016 | 18.4 | 1.18 | 1.14 | 1.22 | 15 | 12 | 17.9 |
| Romania | 2017 | 20.3 | 1.20 | 1.16 | 1.25 | 16.8 | 13.4 | 20 |
| Romania | 2018 | 19.1 | 1.19 | 1.14 | 1.23 | 15.7 | 12.6 | 18.7 |
| Romania | 2019* | 17.1 | 1.16 | 1.12 | 1.20 | 13.8 | 11.1 | 16.5 |
| Romania | 2020 | 16.2 | 1.15 | 1.12 | 1.18 | 12.9 | 10.4 | 15.4 |
| Romania | 2021 | 15.6 | 1.14 | 1.11 | 1.17 | 12.4 | 9.9 | 14.7 |
| Romania | 2022 | 15.7 | 1.14 | 1.11 | 1.17 | 12.5 | 10 | 14.8 |
| United States | 2012 | 8.9 | 1.06 | 1.05 | 1.07 | 5.6 | 4.5 | 6.6 |
| United States | 2013 | 8.6 | 1.06 | 1.04 | 1.07 | 5.3 | 4.3 | 6.2 |
| United States | 2014 | 8.5 | 1.05 | 1.04 | 1.07 | 5.2 | 4.2 | 6.1 |
| United States | 2015* | 8.2 | 1.05 | 1.04 | 1.06 | 4.9 | 4 | 5.8 |
| United States | 2016 | 7.5 | 1.04 | 1.04 | 1.05 | 4.2 | 3.4 | 4.9 |
| United States | 2017 | 7.8 | 1.05 | 1.04 | 1.06 | 4.5 | 3.7 | 5.3 |
| United States | 2018 | 7.9 | 1.05 | 1.04 | 1.06 | 4.6 | 3.7 | 5.4 |
| United Kingdom | 2017 | 10.6 | 1.08 | 1.06 | 1.10 | 7.3 | 5.9 | 8.7 |
| United Kingdom | 2018 | 10.6 | 1.08 | 1.06 | 1.10 | 7.3 | 5.9 | 8.7 |
| United Kingdom | 2019 | 10.5 | 1.08 | 1.06 | 1.09 | 7.2 | 5.8 | 8.6 |
| United Kingdom | 2020* | 8.6 | 1.06 | 1.04 | 1.07 | 5.3 | 4.3 | 6.2 |
| United Kingdom | 2021 | 8.9 | 1.06 | 1.05 | 1.07 | 5.6 | 4.5 | 6.6 |
| United Kingdom | 2022 | 9.1 | 1.06 | 1.05 | 1.07 | 5.8 | 4.7 | 6.8 |
| United Kingdom | 2023 | 8.7 | 1.06 | 1.05 | 1.07 | 5.4 | 4.4 | 6.4 |
| **Upper Middle-Income Countries** | | | | | | | | |
| Argentina | 2011 | 14.9 | 1.13 | 1.10 | 1.16 | 11.7 | 9.4 | 13.9 |
| Argentina | 2012 | 14.1 | 1.12 | 1.10 | 1.15 | 10.9 | 8.7 | 12.9 |
| Argentina | 2013* | 14.2 | 1.12 | 1.10 | 1.15 | 11 | 8.8 | 13.1 |
| Argentina | 2014 | 13.1 | 1.11 | 1.09 | 1.13 | 9.9 | 7.9 | 11.7 |
| Argentina | 2015 | 13.5 | 1.11 | 1.09 | 1.14 | 10.3 | 8.2 | 12.2 |
| Argentina | 2016 | 13.5 | 1.11 | 1.09 | 1.14 | 10.3 | 8.2 | 12.2 |
| Argentina | 2017 | 12.9 | 1.11 | 1.08 | 1.13 | 9.7 | 7.8 | 11.5 |
| Bosnia and Herzegovina | 2016 | 34.2 | 1.38 | 1.28 | 1.48 | 27.5 | 22.2 | 32.6 |
| Bosnia and Herzegovina | 2017 | 32.8 | 1.36 | 1.27 | 1.46 | 26.6 | 21.4 | 31.5 |
| Bosnia and Herzegovina | 2018 | 32.6 | 1.36 | 1.27 | 1.46 | 26.5 | 21.3 | 31.3 |
| Bosnia and Herzegovina | 2019* | 28 | 1.30 | 1.23 | 1.38 | 23.2 | 18.6 | 27.5 |
| Bosnia and Herzegovina | 2020 | 28.9 | 1.31 | 1.24 | 1.39 | 23.8 | 19.1 | 28.3 |
| Bosnia and Herzegovina | 2021 | 26.6 | 1.28 | 1.22 | 1.36 | 22.1 | 17.7 | 26.3 |
| Bosnia and Herzegovina | 2022 | 26.4 | 1.28 | 1.21 | 1.35 | 21.9 | 17.6 | 26.1 |
| Brazil | 2009 | 14.2 | 1.12 | 1.10 | 1.15 | 11 | 8.8 | 13.1 |
| Brazil | 2010 | 14.3 | 1.12 | 1.10 | 1.15 | 11.1 | 8.9 | 13.2 |
| Brazil | 2011 | 14.1 | 1.12 | 1.10 | 1.15 | 10.9 | 8.7 | 12.9 |
| Brazil | 2012* | 13.4 | 1.11 | 1.09 | 1.14 | 10.2 | 8.2 | 12.1 |
| Brazil | 2013 | 12.9 | 1.11 | 1.08 | 1.13 | 9.7 | 7.8 | 11.5 |
| Brazil | 2014 | 13.3 | 1.11 | 1.09 | 1.14 | 10.1 | 8.1 | 12 |
| Brazil | 2015 | 13.8 | 1.12 | 1.09 | 1.14 | 10.6 | 8.5 | 12.6 |
| China | 2013 | 49.7 | 1.56 | 1.41 | 1.72 | 35.8 | 29.1 | 41.9 |
| China | 2014 | 52.4 | 1.59 | 1.43 | 1.76 | 37 | 30.1 | 43.2 |
| China | 2015 | 49.5 | 1.56 | 1.41 | 1.72 | 35.7 | 29 | 41.8 |
| China | 2016* | 45.1 | 1.51 | 1.38 | 1.65 | 33.7 | 27.3 | 39.6 |
| China | 2017 | 42.9 | 1.48 | 1.36 | 1.62 | 32.6 | 26.4 | 38.3 |
| China | 2018 | 38.2 | 1.43 | 1.32 | 1.55 | 30 | 24.2 | 35.4 |
| China | 2019 | 36.7 | 1.41 | 1.31 | 1.52 | 29.1 | 23.5 | 34.4 |
| Ecuador | 2003 | 16.4 | 1.15 | 1.12 | 1.19 | 13.1 | 10.5 | 15.7 |
| Ecuador | 2004 | 17.4 | 1.16 | 1.13 | 1.20 | 14.1 | 11.3 | 16.8 |
| Ecuador | 2005 | 18.9 | 1.18 | 1.14 | 1.23 | 15.5 | 12.4 | 18.5 |
| Ecuador | 2006* | 17.2 | 1.16 | 1.13 | 1.20 | 13.9 | 11.1 | 16.6 |
| Ecuador | 2007 | 17.4 | 1.16 | 1.13 | 1.20 | 14.1 | 11.3 | 16.8 |
| Ecuador | 2008 | 17.2 | 1.16 | 1.13 | 1.20 | 13.9 | 11.1 | 16.6 |
| Ecuador | 2009 | 17.1 | 1.16 | 1.12 | 1.20 | 13.8 | 11.1 | 16.5 |
| Marshall Islands | 2009 | 3.8 | 1.01 | 1.01 | 1.01 | 0.8 | 0.7 | 1 |
| Marshall Islands | 2010 | 4.2 | 1.01 | 1.01 | 1.01 | 1.2 | 1 | 1.3 |
| Marshall Islands | 2011 | 4.4 | 1.01 | 1.01 | 1.02 | 1.3 | 1.1 | 1.5 |
| Marshall Islands | 2012* | 3.6 | 1.01 | 1.01 | 1.01 | 0.7 | 0.6 | 0.8 |
| Marshall Islands | 2013 | 3.4 | 1.01 | 1.00 | 1.01 | 0.6 | 0.5 | 0.6 |
| Marshall Islands | 2014 | 3.3 | 1.00 | 1.00 | 1.01 | 0.5 | 0.4 | 0.5 |
| Marshall Islands | 2015 | 3.8 | 1.01 | 1.01 | 1.01 | 0.8 | 0.7 | 1 |
| Ukraine | 2011 | 19 | 1.18 | 1.14 | 1.23 | 15.6 | 12.5 | 18.6 |
| Ukraine | 2012 | 19 | 1.18 | 1.14 | 1.23 | 15.6 | 12.5 | 18.6 |
| Ukraine | 2013 | 18.3 | 1.18 | 1.14 | 1.22 | 14.9 | 12 | 17.8 |
| Ukraine | 2014* | 18.6 | 1.18 | 1.14 | 1.22 | 15.2 | 12.2 | 18.2 |
| Ukraine | 2015 | 16.7 | 1.16 | 1.12 | 1.19 | 13.4 | 10.8 | 16 |
| Ukraine | 2016 | 16.4 | 1.15 | 1.12 | 1.19 | 13.1 | 10.5 | 15.7 |
| Ukraine | 2017 | 16.9 | 1.16 | 1.12 | 1.19 | 13.6 | 10.9 | 16.2 |
| South Africa | 2008 | 25.8 | 1.27 | 1.21 | 1.34 | 21.5 | 17.2 | 25.5 |
| South Africa | 2009 | 24.9 | 1.26 | 1.20 | 1.33 | 20.7 | 16.6 | 24.7 |
| South Africa | 2010 | 28.7 | 1.31 | 1.23 | 1.39 | 23.7 | 19 | 28.1 |
| South Africa | 2011* | 25 | 1.26 | 1.20 | 1.33 | 20.8 | 16.7 | 24.8 |
| South Africa | 2012 | 26.1 | 1.28 | 1.21 | 1.35 | 21.7 | 17.4 | 25.8 |
| South Africa | 2013 | 25.1 | 1.26 | 1.20 | 1.33 | 20.9 | 16.7 | 24.9 |
| South Africa | 2014 | 23.2 | 1.24 | 1.18 | 1.30 | 19.3 | 15.5 | 23 |
| **Lower Middle-Income Countries** | | | | | | | | |
| Bolivia | 2008 | 27.8 | 1.30 | 1.23 | 1.38 | 23 | 18.5 | 27.3 |
| Bolivia | 2009 | 26.4 | 1.28 | 1.21 | 1.35 | 21.9 | 17.6 | 26.1 |
| Bolivia | 2010 | 36.8 | 1.41 | 1.31 | 1.52 | 29.2 | 23.5 | 34.4 |
| Bolivia | 2011* | 29.1 | 1.32 | 1.24 | 1.40 | 24 | 19.3 | 28.5 |
| Bolivia | 2012 | 26.9 | 1.29 | 1.22 | 1.36 | 22.3 | 17.9 | 26.5 |
| Bolivia | 2013 | 25.3 | 1.27 | 1.20 | 1.33 | 21.1 | 16.9 | 25.1 |
| Bolivia | 2014 | 26.5 | 1.28 | 1.21 | 1.35 | 22 | 17.6 | 26.2 |
| Lesotho | 2009 | 25.6 | 1.27 | 1.21 | 1.34 | 21.3 | 17.1 | 25.3 |
| Lesotho | 2010 | 28.7 | 1.31 | 1.23 | 1.39 | 23.7 | 19 | 28.1 |
| Lesotho | 2011 | 26 | 1.28 | 1.21 | 1.35 | 21.6 | 17.3 | 25.7 |
| Lesotho | 2012* | 23.6 | 1.24 | 1.19 | 1.31 | 19.7 | 15.7 | 23.4 |
| Lesotho | 2013 | 23 | 1.24 | 1.18 | 1.30 | 19.1 | 15.3 | 22.8 |
| Lesotho | 2014 | 22.1 | 1.23 | 1.17 | 1.28 | 18.4 | 14.7 | 21.9 |
| Lesotho | 2015 | 23.3 | 1.24 | 1.18 | 1.30 | 19.4 | 15.5 | 23.1 |
| Tajikistan | 2000 | 24.9 | 1.26 | 1.20 | 1.33 | 20.7 | 16.6 | 24.7 |
| Tajikistan | 2001 | 29.6 | 1.32 | 1.24 | 1.41 | 24.4 | 19.6 | 28.9 |
| Tajikistan | 2002 | 27.8 | 1.30 | 1.23 | 1.38 | 23 | 18.5 | 27.3 |
| Tajikistan | 2003* | 25.7 | 1.27 | 1.21 | 1.34 | 21.4 | 17.1 | 25.4 |
| Tajikistan | 2004 | 26.2 | 1.28 | 1.21 | 1.35 | 21.8 | 17.5 | 25.9 |
| Tajikistan | 2005 | 25.3 | 1.27 | 1.20 | 1.33 | 21.1 | 16.9 | 25.1 |
| Tajikistan | 2006 | 27.9 | 1.30 | 1.23 | 1.38 | 23.1 | 18.5 | 27.4 |

**Supplementary table 4.3: Annual PM2.5 Exposure (µg /m3), Relative Risk and PAF (%) attributable to Ischemic Heart Disease (* indicates breakpoint year)**

| **High Income Countries** | **Year** | **PM2.5** | **RR Mean** | **RR Lower** | **RR Upper** | **PAF Mean** | **PAF Lower** | **PAF Upper** |
| --- | --- | --- | --- | --- | --- | --- | --- | --- |
| Belgium | 2011 | 17 | 1.26 | 1.18 | 1.33 | 20.5 | 15.6 | 24.9 |
| Belgium | 2012 | 15.3 | 1.23 | 1.16 | 1.29 | 18.4 | 14 | 22.4 |
| Belgium | 2013 | 15.9 | 1.24 | 1.17 | 1.30 | 19.1 | 14.5 | 23.3 |
| Belgium | 2014* | 13.2 | 1.19 | 1.13 | 1.24 | 15.6 | 11.9 | 19.1 |
| Belgium | 2015 | 12.7 | 1.18 | 1.13 | 1.22 | 14.9 | 11.3 | 18.3 |
| Belgium | 2016 | 12.3 | 1.17 | 1.12 | 1.21 | 14.4 | 10.9 | 17.6 |
| Belgium | 2017 | 11.9 | 1.16 | 1.12 | 1.20 | 13.8 | 10.5 | 16.9 |
| Bulgaria | 2010 | 25 | 1.40 | 1.28 | 1.53 | 28.6 | 22 | 34.4 |
| Bulgaria | 2011 | 30.3 | 1.49 | 1.34 | 1.64 | 32.7 | 25.3 | 39.1 |
| Bulgaria | 2012 | 25.9 | 1.42 | 1.29 | 1.55 | 29.4 | 22.6 | 35.3 |
| Bulgaria | 2013 | 23.7 | 1.38 | 1.27 | 1.50 | 27.4 | 21 | 33.1 |
| Bulgaria | 2014* | 24.5 | 1.39 | 1.28 | 1.51 | 28.2 | 21.6 | 33.9 |
| Bulgaria | 2015 | 21.6 | 1.34 | 1.24 | 1.45 | 25.5 | 19.5 | 30.8 |
| Bulgaria | 2016 | 21.2 | 1.33 | 1.24 | 1.44 | 25.1 | 19.2 | 30.3 |
| Switzerland | 2000 | 15.1 | 1.22 | 1.16 | 1.28 | 18.1 | 13.8 | 22.1 |
| Switzerland | 2001 | 15.2 | 1.22 | 1.16 | 1.29 | 18.3 | 13.9 | 22.3 |
| Switzerland | 2002 | 15.8 | 1.23 | 1.17 | 1.30 | 19 | 14.5 | 23.2 |
| Switzerland | 2003* | 17.1 | 1.26 | 1.19 | 1.33 | 20.6 | 15.7 | 25 |
| Switzerland | 2004 | 13.2 | 1.19 | 1.13 | 1.24 | 15.6 | 11.9 | 19.1 |
| Switzerland | 2005 | 14 | 1.20 | 1.15 | 1.26 | 16.7 | 12.7 | 20.4 |
| Switzerland | 2006 | 14.4 | 1.21 | 1.15 | 1.27 | 17.2 | 13.1 | 21 |
| Chile | 2015 | 25.1 | 1.40 | 1.28 | 1.53 | 28.7 | 22 | 34.5 |
| Chile | 2016 | 24.5 | 1.39 | 1.28 | 1.51 | 28.2 | 21.6 | 33.9 |
| Chile | 2017 | 23.6 | 1.38 | 1.27 | 1.49 | 27.4 | 21 | 33 |
| Chile | 2018* | 22.4 | 1.36 | 1.25 | 1.46 | 26.2 | 20.1 | 31.7 |
| Chile | 2019 | 22.2 | 1.35 | 1.25 | 1.46 | 26 | 19.9 | 31.5 |
| Chile | 2020 | 21.4 | 1.34 | 1.24 | 1.44 | 25.3 | 19.3 | 30.6 |
| Chile | 2021 | 24.9 | 1.40 | 1.28 | 1.52 | 28.5 | 21.9 | 34.3 |
| Estonia | 2008 | 9.7 | 1.12 | 1.09 | 1.15 | 10.6 | 8.1 | 13 |
| Estonia | 2009 | 9.7 | 1.12 | 1.09 | 1.15 | 10.6 | 8.1 | 13 |
| Estonia | 2010 | 10.6 | 1.14 | 1.10 | 1.17 | 11.9 | 9.1 | 14.6 |
| Estonia | 2011* | 8.8 | 1.10 | 1.08 | 1.13 | 9.2 | 7 | 11.3 |
| Estonia | 2012 | 8.9 | 1.10 | 1.08 | 1.13 | 9.4 | 7.1 | 11.5 |
| Estonia | 2013 | 8.6 | 1.10 | 1.07 | 1.12 | 8.9 | 6.8 | 10.9 |
| Estonia | 2014 | 9.8 | 1.12 | 1.09 | 1.15 | 10.8 | 8.2 | 13.1 |
| France | 2011 | 15.6 | 1.23 | 1.17 | 1.30 | 18.8 | 14.3 | 22.9 |
| France | 2012 | 14.1 | 1.20 | 1.15 | 1.26 | 16.8 | 12.8 | 20.5 |
| France | 2013 | 14.4 | 1.21 | 1.15 | 1.27 | 17.2 | 13.1 | 21 |
| France | 2014* | 11.5 | 1.15 | 1.11 | 1.19 | 13.2 | 10.1 | 16.2 |
| France | 2015 | 12.2 | 1.17 | 1.12 | 1.21 | 14.2 | 10.8 | 17.4 |
| France | 2016 | 11.2 | 1.15 | 1.11 | 1.19 | 12.8 | 9.7 | 15.7 |
| France | 2017 | 10.8 | 1.14 | 1.10 | 1.18 | 12.2 | 9.3 | 15 |
| Croatia | 2010 | 21.3 | 1.34 | 1.24 | 1.44 | 25.2 | 19.2 | 30.4 |
| Croatia | 2011 | 24.5 | 1.39 | 1.28 | 1.51 | 28.2 | 21.6 | 33.9 |
| Croatia | 2012 | 20.8 | 1.33 | 1.23 | 1.43 | 24.7 | 18.8 | 29.9 |
| Croatia | 2013* | 19.7 | 1.31 | 1.22 | 1.40 | 23.5 | 17.9 | 28.5 |
| Croatia | 2014 | 18.3 | 1.28 | 1.20 | 1.36 | 22 | 16.7 | 26.7 |
| Croatia | 2015 | 20.5 | 1.32 | 1.23 | 1.42 | 24.3 | 18.6 | 29.5 |
| Croatia | 2016 | 19.4 | 1.30 | 1.21 | 1.39 | 23.2 | 17.7 | 28.1 |
| Italy | 2013 | 17.5 | 1.27 | 1.19 | 1.34 | 21.1 | 16 | 25.6 |
| Italy | 2014 | 15.8 | 1.23 | 1.17 | 1.30 | 19 | 14.5 | 23.2 |
| Italy | 2015 | 18.5 | 1.29 | 1.20 | 1.37 | 22.2 | 16.9 | 27 |
| Italy | 2016* | 16.3 | 1.24 | 1.18 | 1.31 | 19.6 | 14.9 | 23.9 |
| Italy | 2017 | 17.4 | 1.26 | 1.19 | 1.34 | 20.9 | 15.9 | 25.5 |
| Italy | 2018 | 15.8 | 1.23 | 1.17 | 1.30 | 19 | 14.5 | 23.2 |
| Italy | 2019 | 15.1 | 1.22 | 1.16 | 1.28 | 18.1 | 13.8 | 22.1 |
| Lithuania | 1999 | 17.4 | 1.26 | 1.19 | 1.34 | 20.9 | 15.9 | 25.5 |
| Lithuania | 2000 | 15.1 | 1.22 | 1.16 | 1.28 | 18.1 | 13.8 | 22.1 |
| Lithuania | 2001 | 14.9 | 1.22 | 1.16 | 1.28 | 17.9 | 13.6 | 21.8 |
| Lithuania | 2002* | 17.7 | 1.27 | 1.19 | 1.35 | 21.3 | 16.2 | 25.9 |
| Lithuania | 2003 | 15.6 | 1.23 | 1.17 | 1.30 | 18.8 | 14.3 | 22.9 |
| Lithuania | 2004 | 13.5 | 1.19 | 1.14 | 1.24 | 16 | 12.2 | 19.6 |
| Lithuania | 2005 | 13.7 | 1.19 | 1.14 | 1.25 | 16.3 | 12.4 | 19.9 |
| Latvia | 1999 | 20 | 1.20 | 1.15 | 1.25 | 16.5 | 13.2 | 19.7 |
| Latvia | 2000 | 17.5 | 1.17 | 1.13 | 1.20 | 14.2 | 11.4 | 16.9 |
| Latvia | 2001 | 17.7 | 1.17 | 1.13 | 1.21 | 14.4 | 11.5 | 17.1 |
| Latvia | 2002* | 20.8 | 1.21 | 1.16 | 1.26 | 17.2 | 13.8 | 20.5 |
| Latvia | 2003 | 18.4 | 1.18 | 1.14 | 1.22 | 15 | 12 | 17.9 |
| Latvia | 2004 | 16.7 | 1.16 | 1.12 | 1.19 | 13.4 | 10.8 | 16 |
| Latvia | 2005 | 16.8 | 1.16 | 1.12 | 1.19 | 13.5 | 10.8 | 16.1 |
| Monaco | 2010 | 16.8 | 1.25 | 1.18 | 1.33 | 20.2 | 15.4 | 24.6 |
| Monaco | 2011 | 17.5 | 1.27 | 1.19 | 1.34 | 21.1 | 16 | 25.6 |
| Monaco | 2012 | 17.5 | 1.27 | 1.19 | 1.34 | 21.1 | 16 | 25.6 |
| Monaco | 2013* | 14.3 | 1.21 | 1.15 | 1.26 | 17.1 | 13 | 20.9 |
| Monaco | 2014 | 12.6 | 1.17 | 1.13 | 1.22 | 14.8 | 11.2 | 18.1 |
| Monaco | 2015 | 14.7 | 1.21 | 1.15 | 1.27 | 17.6 | 13.4 | 21.5 |
| Monaco | 2016 | 13.7 | 1.19 | 1.14 | 1.25 | 16.3 | 12.4 | 19.9 |
| Netherlands | 2009 | 16.4 | 1.25 | 1.18 | 1.32 | 19.7 | 15 | 24 |
| Netherlands | 2010 | 16.3 | 1.24 | 1.18 | 1.31 | 19.6 | 14.9 | 23.9 |
| Netherlands | 2011 | 16.4 | 1.25 | 1.18 | 1.32 | 19.7 | 15 | 24 |
| Netherlands | 2012* | 13.4 | 1.19 | 1.14 | 1.24 | 15.9 | 12.1 | 19.4 |
| Netherlands | 2013 | 13.8 | 1.20 | 1.14 | 1.25 | 16.4 | 12.5 | 20.1 |
| Netherlands | 2014 | 13.6 | 1.19 | 1.14 | 1.25 | 16.2 | 12.3 | 19.7 |
| Netherlands | 2015 | 12.2 | 1.17 | 1.12 | 1.21 | 14.2 | 10.8 | 17.4 |
| Portugal | 2002 | 12.7 | 1.18 | 1.13 | 1.22 | 14.9 | 11.3 | 18.3 |
| Portugal | 2003 | 14 | 1.20 | 1.15 | 1.26 | 16.7 | 12.7 | 20.4 |
| Portugal | 2004 | 11.6 | 1.15 | 1.11 | 1.20 | 13.4 | 10.2 | 16.4 |
| Portugal | 2005* | 16.3 | 1.24 | 1.18 | 1.31 | 19.6 | 14.9 | 23.9 |
| Portugal | 2006 | 12.7 | 1.18 | 1.13 | 1.22 | 14.9 | 11.3 | 18.3 |
| Portugal | 2007 | 12.4 | 1.17 | 1.12 | 1.22 | 14.5 | 11 | 17.7 |
| Portugal | 2008 | 8.9 | 1.10 | 1.08 | 1.13 | 9.4 | 7.1 | 11.5 |
| Romania | 2016 | 18.4 | 1.28 | 1.20 | 1.37 | 22.1 | 16.8 | 26.8 |
| Romania | 2017 | 20.3 | 1.32 | 1.23 | 1.41 | 24.1 | 18.4 | 29.3 |
| Romania | 2018 | 19.1 | 1.30 | 1.21 | 1.38 | 22.9 | 17.4 | 27.7 |
| Romania | 2019* | 17.1 | 1.26 | 1.19 | 1.33 | 20.6 | 15.7 | 25 |
| Romania | 2020 | 16.2 | 1.24 | 1.17 | 1.31 | 19.5 | 14.8 | 23.8 |
| Romania | 2021 | 15.6 | 1.23 | 1.17 | 1.30 | 18.8 | 14.3 | 22.9 |
| Romania | 2022 | 15.7 | 1.23 | 1.17 | 1.30 | 18.9 | 14.4 | 23 |
| United States | 2012 | 8.9 | 1.10 | 1.08 | 1.13 | 9.4 | 7.1 | 11.5 |
| United States | 2013 | 8.6 | 1.10 | 1.07 | 1.12 | 8.9 | 6.8 | 10.9 |
| United States | 2014 | 8.5 | 1.10 | 1.07 | 1.12 | 8.8 | 6.7 | 10.7 |
| United States | 2015* | 8.2 | 1.09 | 1.07 | 1.11 | 8.3 | 6.3 | 10.1 |
| United States | 2016 | 7.5 | 1.08 | 1.06 | 1.10 | 7.2 | 5.5 | 8.8 |
| United States | 2017 | 7.8 | 1.08 | 1.06 | 1.10 | 7.7 | 5.9 | 9.4 |
| United States | 2018 | 7.9 | 1.09 | 1.06 | 1.11 | 7.8 | 6 | 9.6 |
| United Kingdom | 2017 | 10.6 | 1.14 | 1.10 | 1.17 | 11.9 | 9.1 | 14.6 |
| United Kingdom | 2018 | 10.6 | 1.14 | 1.10 | 1.17 | 11.9 | 9.1 | 14.6 |
| United Kingdom | 2019 | 10.5 | 1.13 | 1.10 | 1.17 | 11.8 | 9 | 14.4 |
| United Kingdom | 2020* | 8.6 | 1.10 | 1.07 | 1.12 | 8.9 | 6.8 | 10.9 |
| United Kingdom | 2021 | 8.9 | 1.10 | 1.08 | 1.13 | 9.4 | 7.1 | 11.5 |
| United Kingdom | 2022 | 9.1 | 1.11 | 1.08 | 1.13 | 9.7 | 7.4 | 11.8 |
| United Kingdom | 2023 | 8.7 | 1.10 | 1.07 | 1.12 | 9.1 | 6.9 | 11.1 |
| **Upper Middle-Income Countries** | | | | | | | | |
| Argentina | 2011 | 14.9 | 1.22 | 1.16 | 1.28 | 17.9 | 13.6 | 21.8 |
| Argentina | 2012 | 14.1 | 1.20 | 1.15 | 1.26 | 16.8 | 12.8 | 20.5 |
| Argentina | 2013* | 14.2 | 1.20 | 1.15 | 1.26 | 17 | 12.9 | 20.7 |
| Argentina | 2014 | 13.1 | 1.18 | 1.13 | 1.23 | 15.5 | 11.8 | 18.9 |
| Argentina | 2015 | 13.5 | 1.19 | 1.14 | 1.24 | 16 | 12.2 | 19.6 |
| Argentina | 2016 | 13.5 | 1.19 | 1.14 | 1.24 | 16 | 12.2 | 19.6 |
| Argentina | 2017 | 12.9 | 1.18 | 1.13 | 1.23 | 15.2 | 11.6 | 18.6 |
| Bosnia and Herzegovina | 2016 | 34.2 | 1.54 | 1.38 | 1.72 | 35.2 | 27.3 | 41.9 |
| Bosnia and Herzegovina | 2017 | 32.8 | 1.52 | 1.36 | 1.69 | 34.3 | 26.6 | 41 |
| Bosnia and Herzegovina | 2018 | 32.6 | 1.52 | 1.36 | 1.69 | 34.2 | 26.5 | 40.8 |
| Bosnia and Herzegovina | 2019* | 28 | 1.45 | 1.31 | 1.59 | 31 | 23.9 | 37.2 |
| Bosnia and Herzegovina | 2020 | 28.9 | 1.46 | 1.32 | 1.61 | 31.7 | 24.4 | 38 |
| Bosnia and Herzegovina | 2021 | 26.6 | 1.43 | 1.30 | 1.56 | 29.9 | 23 | 36 |
| Bosnia and Herzegovina | 2022 | 26.4 | 1.42 | 1.30 | 1.56 | 29.8 | 22.9 | 35.8 |
| Brazil | 2009 | 14.2 | 1.20 | 1.15 | 1.26 | 17 | 12.9 | 20.7 |
| Brazil | 2010 | 14.3 | 1.21 | 1.15 | 1.26 | 17.1 | 13 | 20.9 |
| Brazil | 2011 | 14.1 | 1.20 | 1.15 | 1.26 | 16.8 | 12.8 | 20.5 |
| Brazil | 2012* | 13.4 | 1.19 | 1.14 | 1.24 | 15.9 | 12.1 | 19.4 |
| Brazil | 2013 | 12.9 | 1.18 | 1.13 | 1.23 | 15.2 | 11.6 | 18.6 |
| Brazil | 2014 | 13.3 | 1.19 | 1.14 | 1.24 | 15.8 | 12 | 19.3 |
| Brazil | 2015 | 13.8 | 1.20 | 1.14 | 1.25 | 16.4 | 12.5 | 20.1 |
| China | 2013 | 49.7 | 1.72 | 1.49 | 1.98 | 42 | 33 | 49.5 |
| China | 2014 | 52.4 | 1.75 | 1.51 | 2.01 | 42.8 | 33.7 | 50.4 |
| China | 2015 | 49.5 | 1.72 | 1.49 | 1.98 | 42 | 32.9 | 49.4 |
| China | 2016* | 45.1 | 1.68 | 1.46 | 1.91 | 40.4 | 31.6 | 47.7 |
| China | 2017 | 42.9 | 1.65 | 1.45 | 1.88 | 39.5 | 30.9 | 46.7 |
| China | 2018 | 38.2 | 1.60 | 1.41 | 1.80 | 37.4 | 29.1 | 44.4 |
| China | 2019 | 36.7 | 1.58 | 1.40 | 1.77 | 36.6 | 28.4 | 43.5 |
| Ecuador | 2003 | 16.4 | 1.25 | 1.18 | 1.32 | 19.7 | 15 | 24 |
| Ecuador | 2004 | 17.4 | 1.26 | 1.19 | 1.34 | 20.9 | 15.9 | 25.5 |
| Ecuador | 2005 | 18.9 | 1.29 | 1.21 | 1.38 | 22.6 | 17.3 | 27.5 |
| Ecuador | 2006* | 17.2 | 1.26 | 1.19 | 1.34 | 20.7 | 15.8 | 25.2 |
| Ecuador | 2007 | 17.4 | 1.26 | 1.19 | 1.34 | 20.9 | 15.9 | 25.5 |
| Ecuador | 2008 | 17.2 | 1.26 | 1.19 | 1.34 | 20.7 | 15.8 | 25.2 |
| Ecuador | 2009 | 17.1 | 1.26 | 1.19 | 1.33 | 20.6 | 15.7 | 25 |
| Marshall Islands | 2009 | 3.8 | 1.02 | 1.01 | 1.02 | 1.6 | 1.3 | 1.9 |
| Marshall Islands | 2010 | 4.2 | 1.02 | 1.02 | 1.03 | 2.2 | 1.7 | 2.6 |
| Marshall Islands | 2011 | 4.4 | 1.03 | 1.02 | 1.03 | 2.5 | 1.9 | 2.9 |
| Marshall Islands | 2012* | 3.6 | 1.01 | 1.01 | 1.02 | 1.3 | 1.1 | 1.6 |
| Marshall Islands | 2013 | 3.4 | 1.01 | 1.01 | 1.01 | 1.1 | 0.9 | 1.2 |
| Marshall Islands | 2014 | 3.3 | 1.01 | 1.01 | 1.01 | 0.9 | 0.8 | 1.1 |
| Marshall Islands | 2015 | 3.8 | 1.02 | 1.01 | 1.02 | 1.6 | 1.3 | 1.9 |
| Ukraine | 2011 | 19 | 1.29 | 1.21 | 1.38 | 22.7 | 17.3 | 27.6 |
| Ukraine | 2012 | 19 | 1.29 | 1.21 | 1.38 | 22.7 | 17.3 | 27.6 |
| Ukraine | 2013 | 18.3 | 1.28 | 1.20 | 1.36 | 22 | 16.7 | 26.7 |
| Ukraine | 2014* | 18.6 | 1.29 | 1.20 | 1.37 | 22.3 | 17 | 27.1 |
| Ukraine | 2015 | 16.7 | 1.25 | 1.18 | 1.32 | 20.1 | 15.3 | 24.5 |
| Ukraine | 2016 | 16.4 | 1.25 | 1.18 | 1.32 | 19.7 | 15 | 24 |
| Ukraine | 2017 | 16.9 | 1.26 | 1.18 | 1.33 | 20.3 | 15.5 | 24.8 |
| South Africa | 2008 | 25.8 | 1.41 | 1.29 | 1.54 | 29.3 | 22.5 | 35.2 |
| South Africa | 2009 | 24.9 | 1.40 | 1.28 | 1.52 | 28.5 | 21.9 | 34.3 |
| South Africa | 2010 | 28.7 | 1.46 | 1.32 | 1.61 | 31.5 | 24.3 | 37.8 |
| South Africa | 2011* | 25 | 1.40 | 1.28 | 1.53 | 28.6 | 22 | 34.4 |
| South Africa | 2012 | 26.1 | 1.42 | 1.29 | 1.55 | 29.5 | 22.7 | 35.5 |
| South Africa | 2013 | 25.1 | 1.40 | 1.28 | 1.53 | 28.7 | 22 | 34.5 |
| South Africa | 2014 | 23.2 | 1.37 | 1.26 | 1.48 | 27 | 20.7 | 32.6 |
| **Lower Middle-Income Countries** | | | | | | | | |
| Bolivia | 2008 | 27.8 | 1.45 | 1.31 | 1.59 | 30.9 | 23.8 | 37.1 |
| Bolivia | 2009 | 26.4 | 1.42 | 1.30 | 1.56 | 29.8 | 22.9 | 35.8 |
| Bolivia | 2010 | 36.8 | 1.58 | 1.40 | 1.77 | 36.6 | 28.5 | 43.6 |
| Bolivia | 2011* | 29.1 | 1.47 | 1.33 | 1.62 | 31.8 | 24.6 | 38.2 |
| Bolivia | 2012 | 26.9 | 1.43 | 1.30 | 1.57 | 30.2 | 23.2 | 36.2 |
| Bolivia | 2013 | 25.3 | 1.41 | 1.28 | 1.53 | 28.8 | 22.2 | 34.7 |
| Bolivia | 2014 | 26.5 | 1.43 | 1.30 | 1.56 | 29.8 | 23 | 35.9 |
| Lesotho | 2009 | 25.6 | 1.41 | 1.29 | 1.54 | 29.1 | 22.4 | 35 |
| Lesotho | 2010 | 28.7 | 1.46 | 1.32 | 1.61 | 31.5 | 24.3 | 37.8 |
| Lesotho | 2011 | 26 | 1.42 | 1.29 | 1.55 | 29.4 | 22.6 | 35.4 |
| Lesotho | 2012* | 23.6 | 1.38 | 1.27 | 1.49 | 27.4 | 21 | 33 |
| Lesotho | 2013 | 23 | 1.37 | 1.26 | 1.48 | 26.8 | 20.5 | 32.4 |
| Lesotho | 2014 | 22.1 | 1.35 | 1.25 | 1.46 | 25.9 | 19.9 | 31.4 |
| Lesotho | 2015 | 23.3 | 1.37 | 1.26 | 1.49 | 27.1 | 20.8 | 32.7 |
| Tajikistan | 2000 | 24.9 | 1.40 | 1.28 | 1.52 | 28.5 | 21.9 | 34.3 |
| Tajikistan | 2001 | 29.6 | 1.47 | 1.33 | 1.63 | 32.2 | 24.9 | 38.6 |
| Tajikistan | 2002 | 27.8 | 1.45 | 1.31 | 1.59 | 30.9 | 23.8 | 37.1 |
| Tajikistan | 2003* | 25.7 | 1.41 | 1.29 | 1.54 | 29.2 | 22.4 | 35.1 |
| Tajikistan | 2004 | 26.2 | 1.42 | 1.29 | 1.55 | 29.6 | 22.8 | 35.6 |
| Tajikistan | 2005 | 25.3 | 1.41 | 1.28 | 1.53 | 28.8 | 22.2 | 34.7 |
| Tajikistan | 2006 | 27.9 | 1.45 | 1.31 | 1.59 | 30.9 | 23.8 | 37.1 |

**Supplementary table 4.4: Annual PM2.5 Exposure (µg /m3), Relative Risk and PAF (%) attributable to Lower Respiratory Infection (* indicates breakpoint year)**

| **Country** | **Year** | **PM2.5** | **RR Mean** | **RR Lower** | **RR Upper** | **PAF Mean** | **PAF Lower** | **PAF Upper** |
| --- | --- | --- | --- | --- | --- | --- | --- | --- |
| Belgium | 2011 | 17 | 1.25 | 1.02 | 1.51 | 20.2 | 2.1 | 33.9 |
| Belgium | 2012 | 15.3 | 1.23 | 1.02 | 1.47 | 18.9 | 1.9 | 32 |
| Belgium | 2013 | 15.9 | 1.24 | 1.02 | 1.49 | 19.4 | 2 | 32.7 |
| Belgium | 2014* | 13.2 | 1.21 | 1.02 | 1.42 | 17.1 | 1.7 | 29.4 |
| Belgium | 2015 | 12.7 | 1.20 | 1.02 | 1.40 | 16.7 | 1.6 | 28.7 |
| Belgium | 2016 | 12.3 | 1.19 | 1.02 | 1.39 | 16.3 | 1.6 | 28.1 |
| Belgium | 2017 | 11.9 | 1.19 | 1.02 | 1.38 | 15.9 | 1.6 | 27.6 |
| Bulgaria | 2010 | 25 | 1.34 | 1.03 | 1.69 | 25.1 | 2.7 | 40.7 |
| Bulgaria | 2011 | 30.3 | 1.38 | 1.03 | 1.78 | 27.7 | 3 | 44 |
| Bulgaria | 2012 | 25.9 | 1.34 | 1.03 | 1.70 | 25.6 | 2.7 | 41.3 |
| Bulgaria | 2013 | 23.7 | 1.32 | 1.03 | 1.66 | 24.4 | 2.6 | 39.7 |
| Bulgaria | 2014* | 24.5 | 1.33 | 1.03 | 1.68 | 24.9 | 2.6 | 40.3 |
| Bulgaria | 2015 | 21.6 | 1.30 | 1.02 | 1.62 | 23.2 | 2.4 | 38.1 |
| Bulgaria | 2016 | 21.2 | 1.30 | 1.02 | 1.61 | 23 | 2.4 | 37.8 |
| Switzerland | 2000 | 15.1 | 1.23 | 1.02 | 1.47 | 18.7 | 1.9 | 31.8 |
| Switzerland | 2001 | 15.2 | 1.23 | 1.02 | 1.47 | 18.8 | 1.9 | 31.9 |
| Switzerland | 2002 | 15.8 | 1.24 | 1.02 | 1.48 | 19.3 | 1.9 | 32.6 |
| Switzerland | 2003* | 17.1 | 1.25 | 1.02 | 1.51 | 20.3 | 2.1 | 34 |
| Switzerland | 2004 | 13.2 | 1.21 | 1.02 | 1.42 | 17.1 | 1.7 | 29.4 |
| Switzerland | 2005 | 14 | 1.22 | 1.02 | 1.44 | 17.8 | 1.8 | 30.4 |
| Switzerland | 2006 | 14.4 | 1.22 | 1.02 | 1.45 | 18.2 | 1.8 | 30.9 |
| Chile | 2015 | 25.1 | 1.34 | 1.03 | 1.69 | 25.2 | 2.7 | 40.7 |
| Chile | 2016 | 24.5 | 1.33 | 1.03 | 1.68 | 24.9 | 2.6 | 40.3 |
| Chile | 2017 | 23.6 | 1.32 | 1.03 | 1.66 | 24.4 | 2.6 | 39.7 |
| Chile | 2018* | 22.4 | 1.31 | 1.03 | 1.63 | 23.7 | 2.5 | 38.7 |
| Chile | 2019 | 22.2 | 1.31 | 1.03 | 1.63 | 23.6 | 2.5 | 38.6 |
| Chile | 2020 | 21.4 | 1.30 | 1.02 | 1.61 | 23.1 | 2.4 | 37.9 |
| Chile | 2021 | 24.9 | 1.33 | 1.03 | 1.68 | 25.1 | 2.7 | 40.6 |
| Estonia | 2008 | 9.7 | 1.16 | 1.01 | 1.32 | 13.6 | 1.3 | 24 |
| Estonia | 2009 | 9.7 | 1.16 | 1.01 | 1.32 | 13.6 | 1.3 | 24 |
| Estonia | 2010 | 10.6 | 1.17 | 1.01 | 1.34 | 14.6 | 1.4 | 25.6 |
| Estonia | 2011* | 8.8 | 1.14 | 1.01 | 1.29 | 12.5 | 1.2 | 22.4 |
| Estonia | 2012 | 8.9 | 1.15 | 1.01 | 1.29 | 12.7 | 1.2 | 22.5 |
| Estonia | 2013 | 8.6 | 1.14 | 1.01 | 1.28 | 12.3 | 1.2 | 22 |
| Estonia | 2014 | 9.8 | 1.16 | 1.01 | 1.32 | 13.7 | 1.3 | 24.2 |
| France | 2011 | 15.6 | 1.24 | 1.02 | 1.48 | 19.1 | 1.9 | 32.3 |
| France | 2012 | 14.1 | 1.22 | 1.02 | 1.44 | 17.9 | 1.8 | 30.6 |
| France | 2013 | 14.4 | 1.22 | 1.02 | 1.45 | 18.2 | 1.8 | 30.9 |
| France | 2014* | 11.5 | 1.18 | 1.02 | 1.37 | 15.5 | 1.5 | 27 |
| France | 2015 | 12.2 | 1.19 | 1.02 | 1.39 | 16.2 | 1.6 | 28 |
| France | 2016 | 11.2 | 1.18 | 1.02 | 1.36 | 15.2 | 1.5 | 26.5 |
| France | 2017 | 10.8 | 1.17 | 1.01 | 1.35 | 14.8 | 1.4 | 25.9 |
| Croatia | 2010 | 21.3 | 1.30 | 1.02 | 1.61 | 23 | 2.4 | 37.9 |
| Croatia | 2011 | 24.5 | 1.33 | 1.03 | 1.68 | 24.9 | 2.6 | 40.3 |
| Croatia | 2012 | 20.8 | 1.29 | 1.02 | 1.60 | 22.7 | 2.4 | 37.4 |
| Croatia | 2013* | 19.7 | 1.28 | 1.02 | 1.57 | 22 | 2.3 | 36.5 |
| Croatia | 2014 | 18.3 | 1.27 | 1.02 | 1.54 | 21.1 | 2.2 | 35.2 |
| Croatia | 2015 | 20.5 | 1.29 | 1.02 | 1.59 | 22.6 | 2.3 | 37.2 |
| Croatia | 2016 | 19.4 | 1.28 | 1.02 | 1.57 | 21.9 | 2.3 | 36.2 |
| Italy | 2013 | 17.5 | 1.26 | 1.02 | 1.52 | 20.5 | 2.1 | 34.4 |
| Italy | 2014 | 15.8 | 1.24 | 1.02 | 1.48 | 19.3 | 1.9 | 32.6 |
| Italy | 2015 | 18.5 | 1.27 | 1.02 | 1.55 | 21.2 | 2.2 | 35.4 |
| Italy | 2016* | 16.3 | 1.24 | 1.02 | 1.50 | 19.7 | 2 | 33.1 |
| Italy | 2017 | 17.4 | 1.26 | 1.02 | 1.52 | 20.5 | 2.1 | 34.3 |
| Italy | 2018 | 15.8 | 1.24 | 1.02 | 1.48 | 19.3 | 1.9 | 32.6 |
| Italy | 2019 | 15.1 | 1.23 | 1.02 | 1.47 | 18.7 | 1.9 | 31.8 |
| Lithuania | 1999 | 17.4 | 1.26 | 1.02 | 1.52 | 20.5 | 2.1 | 34.3 |
| Lithuania | 2000 | 15.1 | 1.23 | 1.02 | 1.47 | 18.7 | 1.9 | 31.8 |
| Lithuania | 2001 | 14.9 | 1.23 | 1.02 | 1.46 | 18.6 | 1.9 | 31.5 |
| Lithuania | 2002* | 17.7 | 1.26 | 1.02 | 1.53 | 20.7 | 2.1 | 34.6 |
| Lithuania | 2003 | 15.6 | 1.24 | 1.02 | 1.48 | 19.1 | 1.9 | 32.3 |
| Lithuania | 2004 | 13.5 | 1.21 | 1.02 | 1.42 | 17.4 | 1.7 | 29.8 |
| Lithuania | 2005 | 13.7 | 1.21 | 1.02 | 1.43 | 17.6 | 1.7 | 30 |
| Latvia | 1999 | 20 | 1.29 | 1.02 | 1.58 | 22.2 | 2.3 | 36.7 |
| Latvia | 2000 | 17.5 | 1.26 | 1.02 | 1.52 | 20.5 | 2.1 | 34.4 |
| Latvia | 2001 | 17.7 | 1.26 | 1.02 | 1.53 | 20.7 | 2.1 | 34.6 |
| Latvia | 2002* | 20.8 | 1.29 | 1.02 | 1.60 | 22.7 | 2.4 | 37.4 |
| Latvia | 2003 | 18.4 | 1.27 | 1.02 | 1.54 | 21.2 | 2.2 | 35.3 |
| Latvia | 2004 | 16.7 | 1.25 | 1.02 | 1.50 | 20 | 2 | 33.6 |
| Latvia | 2005 | 16.8 | 1.25 | 1.02 | 1.51 | 20 | 2 | 33.7 |
| Monaco | 2010 | 16.8 | 1.25 | 1.02 | 1.51 | 20 | 2 | 33.7 |
| Monaco | 2011 | 17.5 | 1.26 | 1.02 | 1.52 | 20.5 | 2.1 | 34.4 |
| Monaco | 2012 | 17.5 | 1.26 | 1.02 | 1.52 | 20.5 | 2.1 | 34.4 |
| Monaco | 2013* | 14.3 | 1.22 | 1.02 | 1.45 | 18.1 | 1.8 | 30.8 |
| Monaco | 2014 | 12.6 | 1.20 | 1.02 | 1.40 | 16.6 | 1.6 | 28.6 |
| Monaco | 2015 | 14.7 | 1.23 | 1.02 | 1.46 | 18.4 | 1.8 | 31.3 |
| Monaco | 2016 | 13.7 | 1.21 | 1.02 | 1.43 | 17.6 | 1.7 | 30 |
| Netherlands | 2009 | 16.4 | 1.25 | 1.02 | 1.50 | 19.7 | 2 | 33.2 |
| Netherlands | 2010 | 16.3 | 1.24 | 1.02 | 1.50 | 19.7 | 2 | 33.1 |
| Netherlands | 2011 | 16.4 | 1.25 | 1.02 | 1.50 | 19.7 | 2 | 33.2 |
| Netherlands | 2012* | 13.4 | 1.21 | 1.02 | 1.42 | 17.3 | 1.7 | 29.7 |
| Netherlands | 2013 | 13.8 | 1.21 | 1.02 | 1.43 | 17.6 | 1.8 | 30.2 |
| Netherlands | 2014 | 13.6 | 1.21 | 1.02 | 1.43 | 17.5 | 1.7 | 29.9 |
| Netherlands | 2015 | 12.2 | 1.19 | 1.02 | 1.39 | 16.2 | 1.6 | 28 |
| Portugal | 2002 | 12.7 | 1.20 | 1.02 | 1.40 | 16.7 | 1.6 | 28.7 |
| Portugal | 2003 | 14 | 1.22 | 1.02 | 1.44 | 17.8 | 1.8 | 30.4 |
| Portugal | 2004 | 11.6 | 1.18 | 1.02 | 1.37 | 15.6 | 1.5 | 27.1 |
| Portugal | 2005* | 16.3 | 1.24 | 1.02 | 1.50 | 19.7 | 2 | 33.1 |
| Portugal | 2006 | 12.7 | 1.20 | 1.02 | 1.40 | 16.7 | 1.6 | 28.7 |
| Portugal | 2007 | 12.4 | 1.20 | 1.02 | 1.39 | 16.4 | 1.6 | 28.3 |
| Portugal | 2008 | 8.9 | 1.15 | 1.01 | 1.29 | 12.7 | 1.2 | 22.5 |
| Romania | 2016 | 18.4 | 1.27 | 1.02 | 1.54 | 21.2 | 2.2 | 35.3 |
| Romania | 2017 | 20.3 | 1.29 | 1.02 | 1.59 | 22.4 | 2.3 | 37 |
| Romania | 2018 | 19.1 | 1.28 | 1.02 | 1.56 | 21.7 | 2.2 | 35.9 |
| Romania | 2019* | 17.1 | 1.25 | 1.02 | 1.51 | 20.3 | 2.1 | 34 |
| Romania | 2020 | 16.2 | 1.24 | 1.02 | 1.49 | 19.6 | 2 | 33 |
| Romania | 2021 | 15.6 | 1.24 | 1.02 | 1.48 | 19.1 | 1.9 | 32.3 |
| Romania | 2022 | 15.7 | 1.24 | 1.02 | 1.48 | 19.2 | 1.9 | 32.5 |
| United States | 2012 | 8.9 | 1.15 | 1.01 | 1.29 | 12.7 | 1.2 | 22.5 |
| United States | 2013 | 8.6 | 1.14 | 1.01 | 1.28 | 12.3 | 1.2 | 22 |
| United States | 2014 | 8.5 | 1.14 | 1.01 | 1.28 | 12.2 | 1.2 | 21.8 |
| United States | 2015* | 8.2 | 1.13 | 1.01 | 1.27 | 11.8 | 1.1 | 21.2 |
| United States | 2016 | 7.5 | 1.12 | 1.01 | 1.24 | 10.9 | 1 | 19.7 |
| United States | 2017 | 7.8 | 1.13 | 1.01 | 1.25 | 11.3 | 1.1 | 20.3 |
| United States | 2018 | 7.9 | 1.13 | 1.01 | 1.26 | 11.4 | 1.1 | 20.5 |
| United Kingdom | 2017 | 10.6 | 1.17 | 1.01 | 1.34 | 14.6 | 1.4 | 25.6 |
| United Kingdom | 2018 | 10.6 | 1.17 | 1.01 | 1.34 | 14.6 | 1.4 | 25.6 |
| United Kingdom | 2019 | 10.5 | 1.17 | 1.01 | 1.34 | 14.5 | 1.4 | 25.4 |
| United Kingdom | 2020* | 8.6 | 1.14 | 1.01 | 1.28 | 12.3 | 1.2 | 22 |
| United Kingdom | 2021 | 8.9 | 1.15 | 1.01 | 1.29 | 12.7 | 1.2 | 22.5 |
| United Kingdom | 2022 | 9.1 | 1.15 | 1.01 | 1.30 | 12.9 | 1.2 | 22.9 |
| United Kingdom | 2023 | 8.7 | 1.14 | 1.01 | 1.28 | 12.4 | 1.2 | 22.2 |
| **Upper Middle-Income Countries** | | | | | | | | |
| Argentina | 2011 | 14.9 | 1.23 | 1.02 | 1.46 | 18.6 | 1.9 | 31.5 |
| Argentina | 2012 | 14.1 | 1.22 | 1.02 | 1.44 | 17.9 | 1.8 | 30.6 |
| Argentina | 2013* | 14.2 | 1.22 | 1.02 | 1.44 | 18 | 1.8 | 30.7 |
| Argentina | 2014 | 13.1 | 1.21 | 1.02 | 1.41 | 17 | 1.7 | 29.3 |
| Argentina | 2015 | 13.5 | 1.21 | 1.02 | 1.42 | 17.4 | 1.7 | 29.8 |
| Argentina | 2016 | 13.5 | 1.21 | 1.02 | 1.42 | 17.4 | 1.7 | 29.8 |
| Argentina | 2017 | 12.9 | 1.20 | 1.02 | 1.41 | 16.8 | 1.7 | 29 |
| Bosnia and Herzegovina | 2016 | 34.2 | 1.41 | 1.03 | 1.85 | 29.3 | 3.2 | 46 |
| Bosnia and Herzegovina | 2017 | 32.8 | 1.40 | 1.03 | 1.83 | 28.7 | 3.1 | 45.3 |
| Bosnia and Herzegovina | 2018 | 32.6 | 1.40 | 1.03 | 1.82 | 28.6 | 3.1 | 45.2 |
| Bosnia and Herzegovina | 2019* | 28 | 1.36 | 1.03 | 1.74 | 26.6 | 2.9 | 42.6 |
| Bosnia and Herzegovina | 2020 | 28.9 | 1.37 | 1.03 | 1.76 | 27 | 2.9 | 43.2 |
| Bosnia and Herzegovina | 2021 | 26.6 | 1.35 | 1.03 | 1.72 | 25.9 | 2.8 | 41.7 |
| Bosnia and Herzegovina | 2022 | 26.4 | 1.35 | 1.03 | 1.71 | 25.8 | 2.8 | 41.6 |
| Brazil | 2009 | 14.2 | 1.22 | 1.02 | 1.44 | 18 | 1.8 | 30.7 |
| Brazil | 2010 | 14.3 | 1.22 | 1.02 | 1.45 | 18.1 | 1.8 | 30.8 |
| Brazil | 2011 | 14.1 | 1.22 | 1.02 | 1.44 | 17.9 | 1.8 | 30.6 |
| Brazil | 2012* | 13.4 | 1.21 | 1.02 | 1.42 | 17.3 | 1.7 | 29.7 |
| Brazil | 2013 | 12.9 | 1.20 | 1.02 | 1.41 | 16.8 | 1.7 | 29 |
| Brazil | 2014 | 13.3 | 1.21 | 1.02 | 1.42 | 17.2 | 1.7 | 29.5 |
| Brazil | 2015 | 13.8 | 1.21 | 1.02 | 1.43 | 17.6 | 1.8 | 30.2 |
| China | 2013 | 49.7 | 1.52 | 1.04 | 2.08 | 34.2 | 3.9 | 52 |
| China | 2014 | 52.4 | 1.53 | 1.04 | 2.12 | 34.8 | 4 | 52.8 |
| China | 2015 | 49.5 | 1.52 | 1.04 | 2.08 | 34.1 | 3.9 | 51.9 |
| China | 2016* | 45.1 | 1.49 | 1.04 | 2.02 | 32.9 | 3.7 | 50.5 |
| China | 2017 | 42.9 | 1.48 | 1.04 | 1.99 | 32.3 | 3.6 | 49.7 |
| China | 2018 | 38.2 | 1.44 | 1.04 | 1.92 | 30.7 | 3.4 | 47.8 |
| China | 2019 | 36.7 | 1.43 | 1.03 | 1.89 | 30.2 | 3.4 | 47.2 |
| Ecuador | 2003 | 16.4 | 1.25 | 1.02 | 1.50 | 19.7 | 2 | 33.2 |
| Ecuador | 2004 | 17.4 | 1.26 | 1.02 | 1.52 | 20.5 | 2.1 | 34.3 |
| Ecuador | 2005 | 18.9 | 1.27 | 1.02 | 1.56 | 21.5 | 2.2 | 35.7 |
| Ecuador | 2006* | 17.2 | 1.26 | 1.02 | 1.52 | 20.3 | 2.1 | 34.1 |
| Ecuador | 2007 | 17.4 | 1.26 | 1.02 | 1.52 | 20.5 | 2.1 | 34.3 |
| Ecuador | 2008 | 17.2 | 1.26 | 1.02 | 1.52 | 20.3 | 2.1 | 34.1 |
| Ecuador | 2009 | 17.1 | 1.25 | 1.02 | 1.51 | 20.3 | 2.1 | 34 |
| Marshall Islands | 2009 | 3.8 | 1.05 | 1.00 | 1.09 | 4.5 | 0.4 | 8.7 |
| Marshall Islands | 2010 | 4.2 | 1.06 | 1.00 | 1.11 | 5.4 | 0.5 | 10.2 |
| Marshall Islands | 2011 | 4.4 | 1.06 | 1.01 | 1.12 | 5.8 | 0.5 | 11 |
| Marshall Islands | 2012* | 3.6 | 1.04 | 1.00 | 1.08 | 4.1 | 0.4 | 7.8 |
| Marshall Islands | 2013 | 3.4 | 1.04 | 1.00 | 1.07 | 3.6 | 0.3 | 6.9 |
| Marshall Islands | 2014 | 3.3 | 1.03 | 1.00 | 1.07 | 3.3 | 0.3 | 6.4 |
| Marshall Islands | 2015 | 3.8 | 1.05 | 1.00 | 1.09 | 4.5 | 0.4 | 8.7 |
| Ukraine | 2011 | 19 | 1.28 | 1.02 | 1.56 | 21.6 | 2.2 | 35.8 |
| Ukraine | 2012 | 19 | 1.28 | 1.02 | 1.56 | 21.6 | 2.2 | 35.8 |
| Ukraine | 2013 | 18.3 | 1.27 | 1.02 | 1.54 | 21.1 | 2.2 | 35.2 |
| Ukraine | 2014* | 18.6 | 1.27 | 1.02 | 1.55 | 21.3 | 2.2 | 35.5 |
| Ukraine | 2015 | 16.7 | 1.25 | 1.02 | 1.50 | 20 | 2 | 33.6 |
| Ukraine | 2016 | 16.4 | 1.25 | 1.02 | 1.50 | 19.7 | 2 | 33.2 |
| Ukraine | 2017 | 16.9 | 1.25 | 1.02 | 1.51 | 20.1 | 2 | 33.8 |
| South Africa | 2008 | 25.8 | 1.34 | 1.03 | 1.70 | 25.5 | 2.7 | 41.2 |
| South Africa | 2009 | 24.9 | 1.33 | 1.03 | 1.68 | 25.1 | 2.7 | 40.6 |
| South Africa | 2010 | 28.7 | 1.37 | 1.03 | 1.76 | 26.9 | 2.9 | 43 |
| South Africa | 2011* | 25 | 1.34 | 1.03 | 1.69 | 25.1 | 2.7 | 40.7 |
| South Africa | 2012 | 26.1 | 1.35 | 1.03 | 1.71 | 25.7 | 2.7 | 41.4 |
| South Africa | 2013 | 25.1 | 1.34 | 1.03 | 1.69 | 25.2 | 2.7 | 40.7 |
| South Africa | 2014 | 23.2 | 1.32 | 1.03 | 1.65 | 24.2 | 2.5 | 39.4 |
| **Lower Middle-Income Countries** | | | | | | | | |
| Bolivia | 2008 | 27.8 | 1.36 | 1.03 | 1.74 | 26.5 | 2.9 | 42.5 |
| Bolivia | 2009 | 26.4 | 1.35 | 1.03 | 1.71 | 25.8 | 2.8 | 41.6 |
| Bolivia | 2010 | 36.8 | 1.43 | 1.03 | 1.89 | 30.2 | 3.4 | 47.2 |
| Bolivia | 2011* | 29.1 | 1.37 | 1.03 | 1.76 | 27.1 | 2.9 | 43.3 |
| Bolivia | 2012 | 26.9 | 1.35 | 1.03 | 1.72 | 26.1 | 2.8 | 41.9 |
| Bolivia | 2013 | 25.3 | 1.34 | 1.03 | 1.69 | 25.3 | 2.7 | 40.9 |
| Bolivia | 2014 | 26.5 | 1.35 | 1.03 | 1.71 | 25.9 | 2.8 | 41.7 |
| Lesotho | 2009 | 25.6 | 1.34 | 1.03 | 1.70 | 25.4 | 2.7 | 41.1 |
| Lesotho | 2010 | 28.7 | 1.37 | 1.03 | 1.76 | 26.9 | 2.9 | 43 |
| Lesotho | 2011 | 26 | 1.34 | 1.03 | 1.70 | 25.6 | 2.7 | 41.3 |
| Lesotho | 2012* | 23.6 | 1.32 | 1.03 | 1.66 | 24.4 | 2.6 | 39.7 |
| Lesotho | 2013 | 23 | 1.32 | 1.03 | 1.64 | 24 | 2.5 | 39.2 |
| Lesotho | 2014 | 22.1 | 1.31 | 1.03 | 1.63 | 23.5 | 2.5 | 38.5 |
| Lesotho | 2015 | 23.3 | 1.32 | 1.03 | 1.65 | 24.2 | 2.6 | 39.4 |
| Tajikistan | 2000 | 24.9 | 1.33 | 1.03 | 1.68 | 25.1 | 2.7 | 40.6 |
| Tajikistan | 2001 | 29.6 | 1.38 | 1.03 | 1.77 | 27.4 | 3 | 43.6 |
| Tajikistan | 2002 | 27.8 | 1.36 | 1.03 | 1.74 | 26.5 | 2.9 | 42.5 |
| Tajikistan | 2003* | 25.7 | 1.34 | 1.03 | 1.70 | 25.5 | 2.7 | 41.1 |
| Tajikistan | 2004 | 26.2 | 1.35 | 1.03 | 1.71 | 25.7 | 2.8 | 41.5 |
| Tajikistan | 2005 | 25.3 | 1.34 | 1.03 | 1.69 | 25.3 | 2.7 | 40.9 |
| Tajikistan | 2006 | 27.9 | 1.36 | 1.03 | 1.74 | 26.6 | 2.9 | 42.6 |

**Supplementary Note 5: Short-term changes in PM2.5 exposure and disease-specific population attributable fractions following detected structural breakpoints**

To assess short- term effectiveness of air quality actions post-breakpoint, we calculated the percentage change in PM2.5 exposure and PAF for each disease, comparing 3-year averages before and after the breakpoint (excluding the breakpoint year).

Percent Change = × 100

This helps to assess whether an observable health benefit followed shortly after the structural break, and how the response differed based on baseline exposure level

**Supplementary Table 5: Percentage change in disease-specific population attributable fractions (PAFs) within three years before and after PM2.5 breakpoints**

| **High Income Countries** | **Breakpoint**  **Year** | **COPD PAF % Change** | **Stroke**  **PAF % Change** | **IHD PAF % Change** | **LRI PAF % Change** |
| --- | --- | --- | --- | --- | --- |
| Belgium | 2014 | -39.71 | -28.91 | -25.69 | -16.3 |
| Bulgaria | 2014 | -24.12 | -16.82 | -13.12 | -9.31 |
| Switzerland | 2003 | -17.53 | -12.09 | -10.65 | -6.51 |
| Chile | 2018 | -9.46 | -6.56 | -5.34 | -3.62 |
| Estonia | 2011 | -19.27 | -13.43 | -12.08 | -7.42 |
| France | 2014 | -38.96 | -29.28 | -25.76 | -12.6 |
| Croatia | 2013 | -19.49 | -13.38 | -11.01 | -7.08 |
| Italy | 2016 | -11.65 | -7.89 | -6.9 | -4.10 |
| Lithuania | 2002 | -16.67 | -11.94 | -10.19 | -6.40 |
| Latvia | 2002 | -9.88 | -7.1 | -7.10 | -3.47 |
| Monaco | 2013 | -34.42 | -25.06 | -21.96 | -13.77 |
| Netherlands | 2012 | -32.74 | -23.47 | -20.68 | -13.20 |
| Portugal | 2005 | -19.77 | -15.03 | -13.78 | -8.58 |
| Romania | 2019 | -28.76 | -20.42 | -17.22 | -11.33 |
| United States | 2015 | -23.3 | -17.4 | -16 | -9.6 |
| United Kingdom | 2020 | -31.1 | -23.3 | -21.1 | -12.9 |
| **Upper Middle-Income Countries** | | | | | |
| Argentina | 2013 | -13.51 | -9.82 | -8.7 | -5.32 |
| Bosnia and Herzegovina | 2019 | -22.75 | -15.88 | -11.86 | -9.12 |
| Brazil | 2012 | -11.11 | -7.88 | -6.88 | -4.44 |
| China | 2016 | -22.27 | -15.48 | -10.49 | -10.6 |
| Ecuador | 2006 | -3.46 | -2.11 | -1.58 | -0.97 |
| Marshall Islands | 2012 | -55.56 | -42.42 | -42.86 | -27.39 |
| Ukraine | 2014 | -18.54 | -13.02 | -10.83 | -7 |
| South Africa | 2011 | -9.08 | -6.07 | -4.59 | -3.1 |
| **Lower Middle-Income Countries** | | | | | |
| Bolivia | 2011 | -17.83 | -11.74 | -8.74 | -6.3 |
| Lesotho | 2012 | -21.10 | -14.56 | -11.33 | -7.96 |
| Tajikistan | 2003 | -5.2 | -3.08 | -2.51 | -1.77 |

**Supplementary Note 6: Long-term evaluation of post-breakpoint exposure and health burden trends**

To evaluate the sustainability of air quality improvements, we estimated long-term linear trends in both PM2.5 exposure (Supplementary Table 2.3) and disease-specific PAF following the selected breakpoint year. For each country–breakpoint event, we fitted a simple ordinary least squares (OLS) regression to the post-break segment of the time series.

Post-break trends were evaluated for COPD, stroke, IHD, and LRI using disease-specific PAF estimates derived from the Integrated Exposure Response framework. The magnitude and direction of the PAF slope provide a direct measure of whether reductions in PM2.5 exposure translated into durable health benefits over time, thereby serving as an indicator of policy durability beyond short-term improvements.

**Supplementary Table 6: Post-breakpoint trend in PM2.5 attributable disease burden**

This table reports post-breakpoint annual trends in population attributable fraction (PAF) for PM2.5-related diseases, including COPD, stroke, IHD, and LRI. For each country, the breakpoint year corresponds to the selected decreasing breakpoint (see Supplementary Tables 2.1–2.2). Post-break PAF slopes were estimated using ordinary least squares regression applied to the post-break segment of the time series. Negative slopes indicate declining attributable burden, while positive slopes indicate increasing burden. Statistical significance was assessed at p < 0.05

| **High Income Countries** | **Disease** | **Breakpoint Year** | **PAF Slope Post Breakpoint** | **p-value** |
| --- | --- | --- | --- | --- |
| Belgium | COPD | 2014 | -0.408 | 6.39E-08 |
| Belgium | Stroke | 2014 | -0.526 | 8.88E-08 |
| Belgium | IHD | 2014 | -0.741 | 1.29E-07 |
| Belgium | LRI | 2014 | -0.533 | 1.90E-07 |
| Bulgaria | COPD | 2013 | -0.776 | 3.35E-08 |
| Bulgaria | Stroke | 2013 | -0.644 | 5.91E-08 |
| Bulgaria | IHD | 2013 | -0.755 | 4.35E-08 |
| Bulgaria | LRI | 2013 | -0.455 | 4.98E-08 |
| Switzerland | COPD | 2003 | -0.305 | 3.80E-28 |
| Switzerland | Stroke | 2003 | -0.361 | 1.40E-29 |
| Switzerland | IHD | 2003 | -0.500 | 5.16E-30 |
| Switzerland | LRI | 2003 | -0.348 | 3.55E-30 |
| Chile | COPD | 2018 | 2.540 | 1.90E-02 |
| Chile | Stroke | 2018 | 1.870 | 1.84E-02 |
| Chile | IHD | 2018 | 1.970 | 1.83E-02 |
| Chile | LRI | 2018 | 1.190 | 2.00E-02 |
| Estonia | COPD | 2011 | -0.170 | 1.73E-06 |
| Estonia | Stroke | 2011 | -0.279 | 7.42E-07 |
| Estonia | IHD | 2011 | -0.434 | 7.98E-07 |
| Estonia | LRI | 2011 | -0.378 | 4.57E-07 |
| France | COPD | 2014 | -0.266 | 8.30E-07 |
| France | Stroke | 2014 | -0.351 | 7.93E-07 |
| France | IHD | 2014 | -0.507 | 8.59E-07 |
| France | LRI | 2014 | -0.375 | 7.57E-07 |
| Croatia | COPD | 2013 | -0.612 | 8.94E-07 |
| Croatia | Stroke | 2013 | -0.560 | 9.65E-07 |
| Croatia | IHD | 2013 | -0.698 | 6.05E-07 |
| Croatia | LRI | 2013 | -0.431 | 9.03E-07 |
| Italy | COPD | 2016 | -0.327 | 6.22E-04 |
| Italy | Stroke | 2016 | -0.310 | 8.10E-04 |
| Italy | IHD | 2016 | -0.396 | 7.00E-04 |
| Italy | LRI | 2016 | -0.260 | 4.93E-04 |
| Lithuania | COPD | 2002 | -0.275 | 1.27E-06 |
| Lithuania | Stroke | 2002 | -0.298 | 4.35E-07 |
| Lithuania | IHD | 2002 | -0.401 | 2.86E-07 |
| Lithuania | LRI | 2002 | -0.267 | 1.73E-07 |
| Latvia | COPD | 2002 | -0.358 | 4.30E-05 |
| Latvia | Stroke | 2002 | -0.341 | 2.93E-05 |
| Latvia | IHD | 2002 | -0.435 | 2.15E-05 |
| Latvia | LRI | 2002 | -0.273 | 1.89E-05 |
| Monaco | COPD | 2013 | -0.304 | 3.78E-05 |
| Monaco | Stroke | 2013 | -0.353 | 2.62E-05 |
| Monaco | IHD | 2013 | -0.474 | 2.64E-05 |
| Monaco | LRI | 2013 | -0.323 | 1.95E-05 |
| Netherlands | COPD | 2012 | -0.408 | 5.74E-18 |
| Netherlands | Stroke | 2012 | -0.501 | 2.26E-17 |
| Netherlands | IHD | 2012 | -0.705 | 2.12E-17 |
| Netherlands | LRI | 2012 | -0.498 | 5.40E-17 |
| Portugal | COPD | 2005 | -0.169 | 3.79E-07 |
| Portugal | Stroke | 2005 | -0.205 | 1.88E-07 |
| Portugal | IHD | 2005 | -0.289 | 1.49E-07 |
| Portugal | LRI | 2005 | -0.209 | 7.30E-08 |
| Romania | COPD | 2019 | -0.470 | 9.46E-02 |
| Romania | Stroke | 2019 | -0.440 | 1.09E-01 |
| Romania | IHD | 2019 | -0.590 | 9.55E-02 |
| Romania | LRI | 2019 | -0.380 | 9.93E-02 |
| **Upper Middle-Income Countries** | | | | |
| Argentina | COPD | 2014 | 0.193 | 4.95E-02 |
| Argentina | Stroke | 2014 | 0.207 | 4.64E-02 |
| Argentina | IHD | 2014 | 0.275 | 4.27E-02 |
| Argentina | LRI | 2014 | 0.178 | 4.79E-02 |
| Bosnia and Herzegovina | COPD | 2019 | -1.370 | 4.40E-02 |
| Bosnia and Herzegovina | Stroke | 2019 | -0.950 | 3.91E-02 |
| Bosnia and Herzegovina | IHD | 2019 | -1.000 | 4.57E-02 |
| Bosnia and Herzegovina | LRI | 2019 | -0.610 | 4.21E-02 |
| Brazil | COPD | 2012 | 0.102 | 1.09E-02 |
| Brazil | Stroke | 2012 | 0.107 | 1.48E-02 |
| Brazil | IHD | 2012 | 0.145 | 1.45E-02 |
| Brazil | LRI | 2012 | 0.098 | 1.05E-02 |
| China | COPD | 2016 | -2.015 | 1.53E-10 |
| China | Stroke | 2016 | -1.257 | 1.47E-10 |
| China | IHD | 2016 | -1.099 | 1.44E-10 |
| China | LRI | 2016 | -0.756 | 1.07E-10 |
| Ecuador | COPD | 2006 | 0.150 | 2.74E-04 |
| Ecuador | Stroke | 2006 | 0.133 | 3.33E-04 |
| Ecuador | IHD | 2006 | 0.161 | 3.23E-04 |
| Ecuador | LRI | 2006 | 0.099 | 2.26E-04 |
| Marshall Islands | COPD | 2012 | -0.010 | 1.24E-03 |
| Marshall Islands | Stroke | 2012 | -0.036 | 4.67E-05 |
| Marshall Islands | IHD | 2012 | -0.076 | 2.65E-05 |
| Marshall Islands | LC | 2012 | -0.096 | 1.15E-05 |
| Marshall Islands | LRI | 2012 | -0.172 | 3.56E-05 |
| Ukraine | COPD | 2014 | -0.579 | 1.71E-08 |
| Ukraine | Stroke | 2014 | -0.573 | 2.76E-08 |
| Ukraine | IHD | 2014 | -0.748 | 2.73E-08 |
| Ukraine | LRI | 2014 | -0.475 | 2.56E-08 |
| South Africa | COPD | 2011 | 0.249 | 1.95E-02 |
| South Africa | Stroke | 2011 | 0.180 | 2.12E-02 |
| South Africa | IHD | 2011 | 0.184 | 2.21E-02 |
| South Africa | LRI | 2011 | 0.112 | 2.18E-02 |
| **Lower Middle-Income Countries** | | | | |
| Bolivia | COPD | 2011 | 0.550 | 8.23E-04 |
| Bolivia | Stroke | 2011 | 0.378 | 7.86E-04 |
| Bolivia | IHD | 2011 | 0.374 | 8.48E-04 |
| Bolivia | LRI | 2011 | 0.233 | 8.52E-04 |
| Lesotho | COPD | 2012 | 0.585 | 3.77E-03 |
| Lesotho | Stroke | 2012 | 0.435 | 3.44E-03 |
| Lesotho | IHD | 2012 | 0.458 | 3.56E-03 |
| Lesotho | LRI | 2012 | 0.284 | 3.41E-03 |
| Tajikistan | COPD | 2003 | 0.458 | 2.09E-12 |
| Tajikistan | Stroke | 2003 | 0.307 | 1.63E-12 |
| Tajikistan | IHD | 2003 | 0.297 | 2.52E-12 |
| Tajikistan | LRI | 2003 | 0.190 | 1.72E-12 |
